# Supplementary material for: Carry-Over or Compensation? The Impact of Winter Harshness and Post-Winter Body Condition on Spring-Fattening in a Migratory Goose Species
Source: PLoS One. 2015 Jul 2;10(7):e0132312. doi: 10.1371/journal.pone.0132312 (PMC4489791; doi:10.1371/journal.pone.0132312)
Supplement: S2 Table — (XLSX) [file pone.0132312.s002.xlsx]

## Sheet: Data
Location	Lat	Long	Date	Ring type	Neck band code	Sex	Age	Bird ID
Vest Stadil Fjord	56.12	8.08	1990-03-27	NB	C51	F	A	262403
Vest Stadil Fjord	56.12	8.08	1990-03-27	NB	C52	F	A	262404
Vest Stadil Fjord	56.12	8.08	1990-03-27	NB	C53	F	A	262405
Vest Stadil Fjord	56.12	8.08	1990-03-27	NB	C54	F	A	262406
Vest Stadil Fjord	56.12	8.08	1990-03-27	NB	C55	F	A	262407
Vest Stadil Fjord	56.12	8.08	1990-03-27	NB	C58	F	A	262410
Vest Stadil Fjord	56.12	8.08	1990-03-27	NB	C59	F	A	262411
Vest Stadil Fjord	56.12	8.08	1990-03-27	NB	C60	F	A	262412
Vest Stadil Fjord	56.12	8.08	1990-03-27	NB	C62	F	A	262414
Vest Stadil Fjord	56.12	8.08	1990-03-27	NB	C64	F	A	262416
Vest Stadil Fjord	56.12	8.08	1990-03-27	NB	C67	F	A	262419
Vest Stadil Fjord	56.12	8.08	1990-03-27	NB	C68	F	A	262420
Vest Stadil Fjord	56.12	8.08	1990-03-27	NB	C69	F	A	262421
Vest Stadil Fjord	56.12	8.08	1990-03-27	NB	C72	F	A	262423
Vest Stadil Fjord	56.12	8.08	1990-03-27	NB	C73	F	A	262424
Vest Stadil Fjord	56.12	8.08	1990-03-27	NB	C75	F	J	262426
Vest Stadil Fjord	56.12	8.08	1990-03-27	NB	C77	F	A	262428
Vest Stadil Fjord	56.12	8.08	1990-03-27	NB	C85	F	A	298816
Vest Stadil Fjord	56.12	8.08	1990-03-27	NB	C86	F	A	262435
Vest Stadil Fjord	56.12	8.08	1990-03-27	NB	C94	F	J	298829
Vest Stadil Fjord	56.12	8.08	1990-03-27	NB	C95	F	A	262442
Vest Stadil Fjord	56.12	8.08	1990-03-27	NB	E02	F	A	262445
Vest Stadil Fjord	56.12	8.08	1990-03-27	NB	E04	F	J	298825
Vest Stadil Fjord	56.12	8.08	1990-03-27	NB	E06	F	A	262447
Vest Stadil Fjord	56.12	8.08	1990-03-27	NB	E07	F	A	262448
Vest Stadil Fjord	56.12	8.08	1990-03-27	NB	E08	F	A	262449
Vest Stadil Fjord	56.12	8.08	1990-03-27	NB	E10	F	A	262450
Vest Stadil Fjord	56.12	8.08	1990-03-27	NB	E12	F	A	298819
Vest Stadil Fjord	56.12	8.08	1990-03-27	NB	E15	F	A	262454
Vest Stadil Fjord	56.12	8.08	1990-03-27	NB	E19	F	J	262457
Vest Stadil Fjord	56.12	8.08	1990-03-27	NB	E20	F	A	262458
Vest Stadil Fjord	56.12	8.08	1990-03-27	NB	E22	F	A	262460
Vest Stadil Fjord	56.12	8.08	1990-03-27	NB	E23	F	A	262461
Vest Stadil Fjord	56.12	8.08	1990-03-27	NB	E24	F	A	262462
Vest Stadil Fjord	56.12	8.08	1990-03-27	NB	C50	M	A	298814
Vest Stadil Fjord	56.12	8.08	1990-03-27	NB	C56	M	A	262408
Vest Stadil Fjord	56.12	8.08	1990-03-27	NB	C57	M	A	262409
Vest Stadil Fjord	56.12	8.08	1990-03-27	NB	C61	M	A	262413
Vest Stadil Fjord	56.12	8.08	1990-03-27	NB	C63	M	A	262415
Vest Stadil Fjord	56.12	8.08	1990-03-27	NB	C70	M	A	262422
Vest Stadil Fjord	56.12	8.08	1990-03-27	NB	C71	M	A	251632
Vest Stadil Fjord	56.12	8.08	1990-03-27	NB	C74	M	A	262425
Vest Stadil Fjord	56.12	8.08	1990-03-27	NB	C76	M	A	262427
Vest Stadil Fjord	56.12	8.08	1990-03-27	NB	C78	M	A	262429
Vest Stadil Fjord	56.12	8.08	1990-03-27	NB	C79	M	A	262430
Vest Stadil Fjord	56.12	8.08	1990-03-27	NB	C80	M	A	262431
Vest Stadil Fjord	56.12	8.08	1990-03-27	NB	C81	M	A	262432
Vest Stadil Fjord	56.12	8.08	1990-03-27	NB	C82	M	A	262433
Vest Stadil Fjord	56.12	8.08	1990-03-27	NB	C83	M	A	262434
Vest Stadil Fjord	56.12	8.08	1990-03-27	NB	C84	M	A	257238
Vest Stadil Fjord	56.12	8.08	1990-03-27	NB	C87	M	A	262436
Vest Stadil Fjord	56.12	8.08	1990-03-27	NB	C88	M	A	262437
Vest Stadil Fjord	56.12	8.08	1990-03-27	NB	C90	M	A	262438
Vest Stadil Fjord	56.12	8.08	1990-03-27	NB	C91	M	A	262439
Vest Stadil Fjord	56.12	8.08	1990-03-27	NB	C92	M	A	262440
Vest Stadil Fjord	56.12	8.08	1990-03-27	NB	C93	M	A	262441
Vest Stadil Fjord	56.12	8.08	1990-03-27	NB	C97	M	A	262444
Vest Stadil Fjord	56.12	8.08	1990-03-27	NB	E11	M	J	262451
Vest Stadil Fjord	56.12	8.08	1990-03-27	NB	E13	M	A	262452
Vest Stadil Fjord	56.12	8.08	1990-03-27	NB	E14	M	J	262453
Vest Stadil Fjord	56.12	8.08	1990-03-27	NB	E17	M	A	262455
Vest Stadil Fjord	56.12	8.08	1990-03-27	NB	E18	M	A	262456
Vest Stadil Fjord	56.12	8.08	1990-03-27	NB	E21	M	A	262459
Vest Stadil Fjord	56.12	8.08	1990-03-27	NB	E26	M	A	262463
Vest Stadil Fjord	56.12	8.08	1990-03-27	NB	E27	M	A	262464
Vest Stadil Fjord	56.12	8.08	1990-03-27	NB	E28	M	A	262465
Vest Stadil Fjord	56.12	8.08	1990-03-28	NB	E30	F	A	262466
Vest Stadil Fjord	56.12	8.08	1990-03-28	NB	E39	F	A	262469
Vest Stadil Fjord	56.12	8.08	1990-03-28	NB	E43	F	J	262470
Vest Stadil Fjord	56.12	8.08	1990-03-28	NB	E44	F	J	262471
Vest Stadil Fjord	56.12	8.08	1990-03-28	NB	E47	F	A	262474
Vest Stadil Fjord	56.12	8.08	1990-03-28	NB	E52	F	A	262477
Vest Stadil Fjord	56.12	8.08	1990-03-28	NB	E58	F	A	262481
Vest Stadil Fjord	56.12	8.08	1990-03-28	NB	E62	F	A	262482
Vest Stadil Fjord	56.12	8.08	1990-03-28	NB	E63	F	A	262483
Vest Stadil Fjord	56.12	8.08	1990-03-28	NB	E70	F	A	262486
Vest Stadil Fjord	56.12	8.08	1990-03-28	NB	E72	F	A	262488
Vest Stadil Fjord	56.12	8.08	1990-03-28	NB	E74	F	A	262490
Vest Stadil Fjord	56.12	8.08	1990-03-28	NB	E32	M	A	262467
Vest Stadil Fjord	56.12	8.08	1990-03-28	NB	E36	M	A	262468
Vest Stadil Fjord	56.12	8.08	1990-03-28	NB	E45	M	A	262472
Vest Stadil Fjord	56.12	8.08	1990-03-28	NB	E46	M	A	262473
Vest Stadil Fjord	56.12	8.08	1990-03-28	NB	E48	M	A	262475
Vest Stadil Fjord	56.12	8.08	1990-03-28	NB	E51	M	A	262476
Vest Stadil Fjord	56.12	8.08	1990-03-28	NB	E53	M	A	262478
Vest Stadil Fjord	56.12	8.08	1990-03-28	NB	E55	M	A	262479
Vest Stadil Fjord	56.12	8.08	1990-03-28	NB	E57	M	A	262480
Vest Stadil Fjord	56.12	8.08	1990-03-28	NB	E64	M	A	262484
Vest Stadil Fjord	56.12	8.08	1990-03-28	NB	E67	M	A	262485
Vest Stadil Fjord	56.12	8.08	1990-03-28	NB	E71	M	A	262487
Vest Stadil Fjord	56.12	8.08	1990-03-28	NB	E73	M	A	262489
Vest Stadil Fjord	56.12	8.08	1991-04-03	NB	A03	F	A	262494
Vest Stadil Fjord	56.12	8.08	1991-04-03	NB	A07	F	J	262498
Vest Stadil Fjord	56.12	8.08	1991-04-03	NB	A08	F	A	262499
Vest Stadil Fjord	56.12	8.08	1991-04-03	NB	A09	F	A	262500
Vest Stadil Fjord	56.12	8.08	1991-04-03	NB	A12	F	A	262503
Vest Stadil Fjord	56.12	8.08	1991-04-03	NB	A13	F	A	262504
Vest Stadil Fjord	56.12	8.08	1991-04-03	NB	A17	F	A	252568
Vest Stadil Fjord	56.12	8.08	1991-04-03	NB	A20	F	A	262508
Vest Stadil Fjord	56.12	8.08	1991-04-03	NB	A21	F	A	262509
Vest Stadil Fjord	56.12	8.08	1991-04-03	NB	A22	F	A	262510
Vest Stadil Fjord	56.12	8.08	1991-04-03	NB	A26	F	A	262513
Vest Stadil Fjord	56.12	8.08	1991-04-03	NB	A27	F	A	262514
Vest Stadil Fjord	56.1927	8.13177	1991-04-03	NB	A29	F	A	298822
Vest Stadil Fjord	56.12	8.08	1991-04-03	NB	A31	F	A	262517
Vest Stadil Fjord	56.12	8.08	1991-04-03	NB	A32	F	A	262518
Vest Stadil Fjord	56.12	8.08	1991-04-03	NB	A34	F	A	262520
Vest Stadil Fjord	56.12	8.08	1991-04-03	NB	A35	F	A	262521
Vest Stadil Fjord	56.12	8.08	1991-04-03	NB	B02	F	A	262527
Vest Stadil Fjord	56.12	8.08	1991-04-03	NB	B03	F	A	262528
Vest Stadil Fjord	56.12	8.08	1991-04-03	NB	B09	F	A	262533
Vest Stadil Fjord	56.12	8.08	1991-04-03	NB	B13	F	J	262536
Vest Stadil Fjord	56.1927	8.13177	1991-04-03	NB	B14	F	J	298808
Vest Stadil Fjord	56.12	8.08	1991-04-03	NB	B15	F	A	262537
Vest Stadil Fjord	56.12	8.08	1991-04-03	NB	B16	F	A	262538
Vest Stadil Fjord	56.12	8.08	1991-04-03	NB	B17	F	J	262539
Vest Stadil Fjord	56.12	8.08	1991-04-03	NB	B18	F	A	262540
Vest Stadil Fjord	56.12	8.08	1991-04-03	NB	B21	F	A	262543
Vest Stadil Fjord	56.12	8.08	1991-04-03	NB	B23	F	A	262545
Vest Stadil Fjord	56.12	8.08	1991-04-03	NB	B24	F	A	251625
Vest Stadil Fjord	56.12	8.08	1991-04-03	NB	B27	F	A	262547
Vest Stadil Fjord	56.12	8.08	1991-04-03	NB	B28	F	A	262548
Vest Stadil Fjord	56.12	8.08	1991-04-03	NB	B29	F	A	262549
Vest Stadil Fjord	56.12	8.08	1991-04-03	NB	B30	F	A	262550
Vest Stadil Fjord	56.12	8.08	1991-04-03	NB	B32	F	A	262552
Vest Stadil Fjord	56.12	8.08	1991-04-03	NB	B37	F	A	262557
Vest Stadil Fjord	56.12	8.08	1991-04-03	NB	B38	F	A	262558
Vest Stadil Fjord	56.12	8.08	1991-04-03	NB	B39	F	J	262559
Vest Stadil Fjord	56.12	8.08	1991-04-03	NB	B40	F	A	262560
Vest Stadil Fjord	56.12	8.08	1991-04-03	NB	G03	F	J	257202
Vest Stadil Fjord	56.12	8.08	1991-04-03	NB	G08	F	A	262566
Vest Stadil Fjord	56.12	8.08	1991-04-03	NB	G09	F	J	262567
Vest Stadil Fjord	56.12	8.08	1991-04-03	NB	G10	F	A	262568
Vest Stadil Fjord	56.12	8.08	1991-04-03	NB	G11	F	A	262569
Vest Stadil Fjord	56.12	8.08	1991-04-03	NB	G12	F	J	262570
Vest Stadil Fjord	56.12	8.08	1991-04-03	NB	G16	F	A	262574
Vest Stadil Fjord	56.12	8.08	1991-04-03	NB	G17	F	A	262575
Vest Stadil Fjord	56.12	8.08	1991-04-03	NB	G18	F	A	262576
Vest Stadil Fjord	56.12	8.08	1991-04-03	NB	G19	F	A	262577
Vest Stadil Fjord	56.12	8.08	1991-04-03	NB	G20	F	A	262578
Vest Stadil Fjord	56.12	8.08	1991-04-03	NB	G21	F	A	262579
Vest Stadil Fjord	56.12	8.08	1991-04-03	NB	G24	F	A	262582
Vest Stadil Fjord	56.12	8.08	1991-04-03	NB	G26	F	J	262584
Vest Stadil Fjord	56.12	8.08	1991-04-03	NB	G28	F	A	262586
Vest Stadil Fjord	56.12	8.08	1991-04-03	NB	G31	F	J	262589
Vest Stadil Fjord	56.12	8.08	1991-04-03	NB	G33	F	A	262591
Vest Stadil Fjord	56.12	8.08	1991-04-03	NB	G34	F	A	262592
Vest Stadil Fjord	56.12	8.08	1991-04-03	NB	G38	F	A	262596
Vest Stadil Fjord	56.12	8.08	1991-04-03	NB	G39	F	A	262597
Vest Stadil Fjord	56.12	8.08	1991-04-03	NB	G40	F	A	262598
Vest Stadil Fjord	56.12	8.08	1991-04-03	NB	H05	F	A	262602
Vest Stadil Fjord	56.12	8.08	1991-04-03	NB	H07	F	J	262604
Vest Stadil Fjord	56.12	8.08	1991-04-03	NB	H08	F	A	262605
Vest Stadil Fjord	56.12	8.08	1991-04-03	NB	H09	F	A	262606
Vest Stadil Fjord	56.12	8.08	1991-04-03	NB	H14	F	J	262611
Vest Stadil Fjord	56.12	8.08	1991-04-03	NB	H16	F	A	262613
Vest Stadil Fjord	56.12	8.08	1991-04-03	NB	H20	F	A	262617
Vest Stadil Fjord	56.12	8.08	1991-04-03	NB	H31	F	A	262628
Vest Stadil Fjord	56.12	8.08	1991-04-03	NB	H33	F	J	262630
Vest Stadil Fjord	56.12	8.08	1991-04-03	NB	H34	F	A	262631
Vest Stadil Fjord	56.12	8.08	1991-04-03	NB	H38	F	J	262635
Vest Stadil Fjord	56.12	8.08	1991-04-03	NB	H40	F	A	262637
Vest Stadil Fjord	56.12	8.08	1991-04-03	NB	J02	F	A	262638
Vest Stadil Fjord	56.12	8.08	1991-04-03	NB	J10	F	A	262646
Vest Stadil Fjord	56.12	8.08	1991-04-03	NB	A02	M	A	262493
Vest Stadil Fjord	56.12	8.08	1991-04-03	NB	A04	M	J	262495
Vest Stadil Fjord	56.12	8.08	1991-04-03	NB	A06	M	A	262497
Vest Stadil Fjord	56.12	8.08	1991-04-03	NB	A10	M	J	262501
Vest Stadil Fjord	56.12	8.08	1991-04-03	NB	A11	M	A	262502
Vest Stadil Fjord	56.12	8.08	1991-04-03	NB	A14	M	A	257008
Vest Stadil Fjord	56.12	8.08	1991-04-03	NB	A15	M	A	262505
Vest Stadil Fjord	56.12	8.08	1991-04-03	NB	A16	M	A	262506
Vest Stadil Fjord	56.12	8.08	1991-04-03	NB	A18	M	A	257223
Vest Stadil Fjord	56.12	8.08	1991-04-03	NB	A19	M	A	262507
Vest Stadil Fjord	56.12	8.08	1991-04-03	NB	A24	M	A	262512
Vest Stadil Fjord	56.1927	8.13177	1991-04-03	NB	A25	M	J	298807
Vest Stadil Fjord	56.12	8.08	1991-04-03	NB	A28	M	A	262515
Vest Stadil Fjord	56.12	8.08	1991-04-03	NB	A30	M	A	262516
Vest Stadil Fjord	56.12	8.08	1991-04-03	NB	A33	M	J	262519
Vest Stadil Fjord	56.12	8.08	1991-04-03	NB	A36	M	A	262522
Vest Stadil Fjord	56.12	8.08	1991-04-03	NB	A37	M	A	262523
Vest Stadil Fjord	56.12	8.08	1991-04-03	NB	A38	M	J	262524
Vest Stadil Fjord	56.12	8.08	1991-04-03	NB	A40	M	A	262526
Vest Stadil Fjord	56.12	8.08	1991-04-03	NB	B04	M	A	262529
Vest Stadil Fjord	56.12	8.08	1991-04-03	NB	B05	M	J	262530
Vest Stadil Fjord	56.12	8.08	1991-04-03	NB	B06	M	A	262531
Vest Stadil Fjord	56.12	8.08	1991-04-03	NB	B07	M	A	262532
Vest Stadil Fjord	56.12	8.08	1991-04-03	NB	B08	M	A	257225
Vest Stadil Fjord	56.12	8.08	1991-04-03	NB	B10	M	A	262534
Vest Stadil Fjord	56.12	8.08	1991-04-03	NB	B12	M	A	262535
Vest Stadil Fjord	56.12	8.08	1991-04-03	NB	B19	M	A	262541
Vest Stadil Fjord	56.12	8.08	1991-04-03	NB	B20	M	A	262542
Vest Stadil Fjord	56.12	8.08	1991-04-03	NB	B22	M	A	262544
Vest Stadil Fjord	56.12	8.08	1991-04-03	NB	B25	M	A	262546
Vest Stadil Fjord	56.12	8.08	1991-04-03	NB	B26	M	A	257227
Vest Stadil Fjord	56.12	8.08	1991-04-03	NB	B33	M	A	262553
Vest Stadil Fjord	56.12	8.08	1991-04-03	NB	B34	M	A	262554
Vest Stadil Fjord	56.12	8.08	1991-04-03	NB	B35	M	A	262555
Vest Stadil Fjord	56.12	8.08	1991-04-03	NB	B36	M	A	262556
Vest Stadil Fjord	56.12	8.08	1991-04-03	NB	G02	M	A	262561
Vest Stadil Fjord	56.12	8.08	1991-04-03	NB	G05	M	J	262563
Vest Stadil Fjord	56.12	8.08	1991-04-03	NB	G13	M	J	262571
Vest Stadil Fjord	56.12	8.08	1991-04-03	NB	G14	M	A	262572
Vest Stadil Fjord	56.12	8.08	1991-04-03	NB	G22	M	A	262580
Vest Stadil Fjord	56.12	8.08	1991-04-03	NB	G23	M	A	262581
Vest Stadil Fjord	56.12	8.08	1991-04-03	NB	G27	M	A	262585
Vest Stadil Fjord	56.12	8.08	1991-04-03	NB	G29	M	A	262587
Vest Stadil Fjord	56.12	8.08	1991-04-03	NB	G30	M	A	262588
Vest Stadil Fjord	56.12	8.08	1991-04-03	NB	G32	M	A	262590
Vest Stadil Fjord	56.12	8.08	1991-04-03	NB	G35	M	A	262593
Vest Stadil Fjord	56.12	8.08	1991-04-03	NB	G36	M	J	262594
Vest Stadil Fjord	56.12	8.08	1991-04-03	NB	G37	M	J	262595
Vest Stadil Fjord	56.12	8.08	1991-04-03	NB	H02	M	A	262599
Vest Stadil Fjord	56.12	8.08	1991-04-03	NB	H03	M	A	262600
Vest Stadil Fjord	56.12	8.08	1991-04-03	NB	H04	M	A	262601
Vest Stadil Fjord	56.12	8.08	1991-04-03	NB	H06	M	A	262603
Vest Stadil Fjord	56.12	8.08	1991-04-03	NB	H10	M	J	262607
Vest Stadil Fjord	56.12	8.08	1991-04-03	NB	H13	M	A	262610
Vest Stadil Fjord	56.12	8.08	1991-04-03	NB	H15	M	J	262612
Vest Stadil Fjord	56.12	8.08	1991-04-03	NB	H17	M	A	262614
Vest Stadil Fjord	56.12	8.08	1991-04-03	NB	H19	M	A	262616
Vest Stadil Fjord	56.12	8.08	1991-04-03	NB	H21	M	A	262618
Vest Stadil Fjord	56.12	8.08	1991-04-03	NB	H23	M	A	262620
Vest Stadil Fjord	56.12	8.08	1991-04-03	NB	H24	M	A	262621
Vest Stadil Fjord	56.12	8.08	1991-04-03	NB	H25	M	A	262622
Vest Stadil Fjord	56.12	8.08	1991-04-03	NB	H26	M	A	262623
Vest Stadil Fjord	56.12	8.08	1991-04-03	NB	H27	M	A	262624
Vest Stadil Fjord	56.12	8.08	1991-04-03	NB	H28	M	A	262625
Vest Stadil Fjord	56.12	8.08	1991-04-03	NB	H29	M	A	262626
Vest Stadil Fjord	56.12	8.08	1991-04-03	NB	H30	M	J	262627
Vest Stadil Fjord	56.12	8.08	1991-04-03	NB	H32	M	A	262629
Vest Stadil Fjord	56.12	8.08	1991-04-03	NB	H35	M	A	262632
Vest Stadil Fjord	56.12	8.08	1991-04-03	NB	H36	M	A	262633
Vest Stadil Fjord	56.12	8.08	1991-04-03	NB	H39	M	A	262636
Vest Stadil Fjord	56.12	8.08	1991-04-03	NB	J03	M	A	262639
Vest Stadil Fjord	56.12	8.08	1991-04-03	NB	J04	M	A	262640
Vest Stadil Fjord	56.12	8.08	1991-04-03	NB	J06	M	A	262642
Vest Stadil Fjord	56.12	8.08	1991-04-03	NB	J07	M	J	262643
Vest Stadil Fjord	56.12	8.08	1991-04-03	NB	J09	M	A	262645
Vest Stadil Fjord	56.1927	8.13177	1991-04-03	NB	Y70	M	A	298809
Vest Stadil Fjord	56.12	8.08	1992-03-25	NB	J15	F	A	262651
Vest Stadil Fjord	56.12	8.08	1992-03-25	NB	J18	F	J	262654
Vest Stadil Fjord	56.12	8.08	1992-03-25	NB	J19	F	A	298811
Vest Stadil Fjord	56.12	8.08	1992-03-25	NB	J24	F	A	262658
Vest Stadil Fjord	56.12	8.08	1992-03-25	NB	J25	F	J	262659
Vest Stadil Fjord	56.12	8.08	1992-03-25	NB	J26	F	J	262660
Vest Stadil Fjord	56.12	8.08	1992-03-25	NB	J31	F	A	262665
Vest Stadil Fjord	56.12	8.08	1992-03-25	NB	J11	M	A	262647
Vest Stadil Fjord	56.12	8.08	1992-03-25	NB	J13	M	A	262649
Vest Stadil Fjord	56.12	8.08	1992-03-25	NB	J14	M	A	262650
Vest Stadil Fjord	56.12	8.08	1992-03-25	NB	J16	M	A	262652
Vest Stadil Fjord	56.12	8.08	1992-03-25	NB	J17	M	J	262653
Vest Stadil Fjord	56.12	8.08	1992-03-25	NB	J21	M	A	262656
Vest Stadil Fjord	56.12	8.08	1992-03-25	NB	J23	M	A	262657
Vest Stadil Fjord	56.12	8.08	1992-03-25	NB	J28	M	J	262662
Vest Stadil Fjord	56.12	8.08	1992-03-25	NB	J29	M	J	262663
Vest Stadil Fjord	56.12	8.08	1992-03-25	NB	J30	M	A	262664
Vest Stadil Fjord	56.12	8.08	1992-03-25	NB	J70	M	A	298820
Vest Stadil Fjord	56.12	8.08	1992-03-25	NB	J85	M	A	298813
Vest Stadil Fjord	56.12	8.08	1992-03-26	NB	J34	F	A	262669
Vest Stadil Fjord	56.12	8.08	1992-03-26	NB	J36	F	A	262671
Vest Stadil Fjord	56.12	8.08	1992-03-26	NB	J37	F	A	262672
Vest Stadil Fjord	56.12	8.08	1992-03-26	NB	J40	F	A	262675
Vest Stadil Fjord	56.12	8.08	1992-03-26	NB	J41	F	J	262676
Vest Stadil Fjord	56.12	8.08	1992-03-26	NB	J43	F	A	262678
Vest Stadil Fjord	56.12	8.08	1992-03-26	NB	J50	F	J	262685
Vest Stadil Fjord	56.12	8.08	1992-03-26	NB	J54	F	J	262689
Vest Stadil Fjord	56.12	8.08	1992-03-26	NB	J57	F	A	262692
Vest Stadil Fjord	56.12	8.08	1992-03-26	NB	J63	F	J	262696
Vest Stadil Fjord	56.12	8.08	1992-03-26	NB	J69	F	A	262700
Vest Stadil Fjord	56.12	8.08	1992-03-26	NB	J73	F	A	262703
Vest Stadil Fjord	56.12	8.08	1992-03-26	NB	J75	F	A	262705
Vest Stadil Fjord	56.12	8.08	1992-03-26	NB	J78	F	A	262708
Vest Stadil Fjord	56.12	8.08	1992-03-26	NB	J82	F	A	262710
Vest Stadil Fjord	56.12	8.08	1992-03-26	NB	J83	F	J	262711
Vest Stadil Fjord	56.12	8.08	1992-03-26	NB	J88	F	J	262715
Vest Stadil Fjord	56.12	8.08	1992-03-26	NB	J94	F	A	262718
Vest Stadil Fjord	56.12	8.08	1992-03-26	NB	J95	F	A	262719
Vest Stadil Fjord	56.12	8.08	1992-03-26	NB	J97	F	A	262720
Vest Stadil Fjord	56.12	8.08	1992-03-26	NB	K03	F	J	262722
Vest Stadil Fjord	56.12	8.08	1992-03-26	NB	K04	F	A	257239
Vest Stadil Fjord	56.12	8.08	1992-03-26	NB	K05	F	J	262723
Vest Stadil Fjord	56.12	8.08	1992-03-26	NB	K06	F	A	262724
Vest Stadil Fjord	56.12	8.08	1992-03-26	NB	K07	F	A	262725
Vest Stadil Fjord	56.12	8.08	1992-03-26	NB	K12	F	J	262730
Vest Stadil Fjord	56.12	8.08	1992-03-26	NB	K13	F	A	262731
Vest Stadil Fjord	56.12	8.08	1992-03-26	NB	K14	F	A	262732
Vest Stadil Fjord	56.12	8.08	1992-03-26	NB	K15	F	A	262733
Vest Stadil Fjord	56.12	8.08	1992-03-26	NB	K16	F	A	262734
Vest Stadil Fjord	56.12	8.08	1992-03-26	NB	K20	F	J	262738
Vest Stadil Fjord	56.12	8.08	1992-03-26	NB	K23	F	A	262741
Vest Stadil Fjord	56.12	8.08	1992-03-26	NB	K26	F	A	262744
Vest Stadil Fjord	56.12	8.08	1992-03-26	NB	K27	F	J	262745
Vest Stadil Fjord	56.12	8.08	1992-03-26	NB	K28	F	J	262746
Vest Stadil Fjord	56.12	8.08	1992-03-26	NB	K29	F	J	262747
Vest Stadil Fjord	56.12	8.08	1992-03-26	NB	K32	F	J	262750
Vest Stadil Fjord	56.12	8.08	1992-03-26	NB	K33	F	J	262751
Vest Stadil Fjord	56.12	8.08	1992-03-26	NB	J22	M	A	262666
Vest Stadil Fjord	56.12	8.08	1992-03-26	NB	J32	M	A	262667
Vest Stadil Fjord	56.12	8.08	1992-03-26	NB	J33	M	A	262668
Vest Stadil Fjord	56.12	8.08	1992-03-26	NB	J35	M	A	262670
Vest Stadil Fjord	56.12	8.08	1992-03-26	NB	J38	M	A	262673
Vest Stadil Fjord	56.12	8.08	1992-03-26	NB	J39	M	A	262674
Vest Stadil Fjord	56.12	8.08	1992-03-26	NB	J42	M	A	262677
Vest Stadil Fjord	56.12	8.08	1992-03-26	NB	J44	M	A	262679
Vest Stadil Fjord	56.12	8.08	1992-03-26	NB	J45	M	A	262680
Vest Stadil Fjord	56.12	8.08	1992-03-26	NB	J46	M	A	262681
Vest Stadil Fjord	56.12	8.08	1992-03-26	NB	J47	M	A	262682
Vest Stadil Fjord	56.12	8.08	1992-03-26	NB	J49	M	A	262684
Vest Stadil Fjord	56.12	8.08	1992-03-26	NB	J52	M	J	262687
Vest Stadil Fjord	56.12	8.08	1992-03-26	NB	J53	M	A	262688
Vest Stadil Fjord	56.12	8.08	1992-03-26	NB	J55	M	A	262690
Vest Stadil Fjord	56.12	8.08	1992-03-26	NB	J58	M	A	262693
Vest Stadil Fjord	56.12	8.08	1992-03-26	NB	J59	M	J	262694
Vest Stadil Fjord	56.12	8.08	1992-03-26	NB	J62	M	A	262695
Vest Stadil Fjord	56.12	8.08	1992-03-26	NB	J64	M	A	262697
Vest Stadil Fjord	56.12	8.08	1992-03-26	NB	J65	M	J	262698
Vest Stadil Fjord	56.12	8.08	1992-03-26	NB	J67	M	A	262699
Vest Stadil Fjord	56.12	8.08	1992-03-26	NB	J71	M	A	262701
Vest Stadil Fjord	56.12	8.08	1992-03-26	NB	J76	M	A	262706
Vest Stadil Fjord	56.12	8.08	1992-03-26	NB	J77	M	A	262707
Vest Stadil Fjord	56.12	8.08	1992-03-26	NB	J79	M	A	262709
Vest Stadil Fjord	56.12	8.08	1992-03-26	NB	J84	M	A	262712
Vest Stadil Fjord	56.12	8.08	1992-03-26	NB	J86	M	J	262713
Vest Stadil Fjord	56.12	8.08	1992-03-26	NB	K02	M	A	262721
Vest Stadil Fjord	56.12	8.08	1992-03-26	NB	K08	M	A	262726
Vest Stadil Fjord	56.12	8.08	1992-03-26	NB	K10	M	A	262728
Vest Stadil Fjord	56.12	8.08	1992-03-26	NB	K17	M	J	262735
Vest Stadil Fjord	56.12	8.08	1992-03-26	NB	K19	M	J	262737
Vest Stadil Fjord	56.12	8.08	1992-03-26	NB	K21	M	A	262739
Vest Stadil Fjord	56.12	8.08	1992-03-26	NB	K22	M	A	262740
Vest Stadil Fjord	56.12	8.08	1992-03-26	NB	K25	M	A	262743
Vest Stadil Fjord	56.12	8.08	1992-03-26	NB	K30	M	A	262748
Vest Stadil Fjord	56.12	8.08	1992-03-26	NB	K34	M	A	262752
Vest Stadil Fjord	56.12	8.08	1992-03-26	NB	K35	M	A	262753
Vest Stadil Fjord	56.12	8.08	1992-03-26	NB	K39	M	A	262757
Vest Stadil Fjord	56.12	8.08	1992-05-04	NB	K40	F	A	262758
Vest Stadil Fjord	56.12	8.08	1992-05-04	NB	K42	F	A	262760
Vest Stadil Fjord	56.12	8.08	1992-05-04	NB	K43	F	J	262761
Vest Stadil Fjord	56.12	8.08	1992-05-04	NB	K46	F	A	262764
Vest Stadil Fjord	56.12	8.08	1992-05-04	NB	K48	F	A	262766
Vest Stadil Fjord	56.12	8.08	1992-05-04	NB	K49	F	A	262767
Vest Stadil Fjord	56.12	8.08	1992-05-04	NB	K51	F	A	262769
Vest Stadil Fjord	56.12	8.08	1992-05-04	NB	K55	F	A	262773
Vest Stadil Fjord	56.12	8.08	1992-05-04	NB	K57	F	A	262775
Vest Stadil Fjord	56.12	8.08	1992-05-04	NB	K62	F	A	257229
Vest Stadil Fjord	56.12	8.08	1992-05-04	NB	K66	F	J	262780
Vest Stadil Fjord	56.12	8.08	1992-05-04	NB	K69	F	A	257232
Vest Stadil Fjord	56.12	8.08	1992-05-04	NB	K71	F	A	262782
Vest Stadil Fjord	56.12	8.08	1992-05-04	NB	K74	F	A	262785
Vest Stadil Fjord	56.12	8.08	1992-05-04	NB	K76	F	A	262786
Vest Stadil Fjord	56.12	8.08	1992-05-04	NB	K77	F	J	262787
Vest Stadil Fjord	56.12	8.08	1992-05-04	NB	K80	F	J	262790
Vest Stadil Fjord	56.12	8.08	1992-05-04	NB	K41	M	A	262759
Vest Stadil Fjord	56.12	8.08	1992-05-04	NB	K44	M	J	262762
Vest Stadil Fjord	56.12	8.08	1992-05-04	NB	K45	M	A	262763
Vest Stadil Fjord	56.12	8.08	1992-05-04	NB	K47	M	A	262765
Vest Stadil Fjord	56.12	8.08	1992-05-04	NB	K50	M	A	262768
Vest Stadil Fjord	56.12	8.08	1992-05-04	NB	K52	M	A	262770
Vest Stadil Fjord	56.12	8.08	1992-05-04	NB	K53	M	J	262771
Vest Stadil Fjord	56.12	8.08	1992-05-04	NB	K56	M	A	262774
Vest Stadil Fjord	56.12	8.08	1992-05-04	NB	K58	M	A	262776
Vest Stadil Fjord	56.12	8.08	1992-05-04	NB	K59	M	A	262777
Vest Stadil Fjord	56.12	8.08	1992-05-04	NB	K63	M	A	262778
Vest Stadil Fjord	56.12	8.08	1992-05-04	NB	K67	M	A	258218
Vest Stadil Fjord	56.12	8.08	1992-05-04	NB	K70	M	A	262781
Vest Stadil Fjord	56.12	8.08	1992-05-04	NB	K72	M	A	262783
Vest Stadil Fjord	56.12	8.08	1992-05-04	NB	K73	M	A	262784
Vest Stadil Fjord	56.12	8.08	1992-05-04	NB	K78	M	A	262788
Vest Stadil Fjord	56.12	8.08	1992-05-04	NB	K79	M	A	262789
Gipsdalen, Svalbard	78.26	16.35	1993-08-04	NB	L02	F	A	262791
Gipsdalen, Svalbard	78.26	16.35	1993-08-04	NB	L03	F	A	262792
Gipsdalen, Svalbard	78.26	16.35	1993-08-04	NB	L04	F	A	262793
Vest Stadil Fjord	56.12	8.08	1994-03-17	NB	K83	F	A	262796
Vest Stadil Fjord	56.12	8.08	1994-03-17	NB	K84	F	J	262797
Vest Stadil Fjord	56.12	8.08	1994-03-17	NB	K85	F	J	262798
Vest Stadil Fjord	56.12	8.08	1994-03-17	NB	K87	F	A	262800
Vest Stadil Fjord	56.12	8.08	1994-03-17	NB	K88	F	A	252446
Vest Stadil Fjord	56.12	8.08	1994-03-17	NB	K93	F	A	262801
Vest Stadil Fjord	56.12	8.08	1994-03-17	NB	K94	F	A	262802
Vest Stadil Fjord	56.12	8.08	1994-03-17	NB	K97	F	A	262804
Vest Stadil Fjord	56.12	8.08	1994-03-17	NB	L05	F	J	262805
Vest Stadil Fjord	56.12	8.08	1994-03-17	NB	L08	F	J	262807
Vest Stadil Fjord	56.12	8.08	1994-03-17	NB	L12	F	A	262810
Vest Stadil Fjord	56.12	8.08	1994-03-17	NB	L14	F	A	262812
Vest Stadil Fjord	56.12	8.08	1994-03-17	NB	L18	F	A	252476
Vest Stadil Fjord	56.12	8.08	1994-03-17	NB	L19	F	J	262815
Vest Stadil Fjord	56.12	8.08	1994-03-17	NB	L22	F	A	262818
Vest Stadil Fjord	56.12	8.08	1994-03-17	NB	L24	F	J	262820
Vest Stadil Fjord	56.12	8.08	1994-03-17	NB	L27	F	J	257009
Vest Stadil Fjord	56.12	8.08	1994-03-17	NB	L28	F	A	262823
Vest Stadil Fjord	56.12	8.08	1994-03-17	NB	L29	F	J	262824
Vest Stadil Fjord	56.12	8.08	1994-03-17	NB	L34	F	A	262828
Vest Stadil Fjord	56.12	8.08	1994-03-17	NB	L36	F	J	262830
Vest Stadil Fjord	56.12	8.08	1994-03-17	NB	L42	F	A	262835
Vest Stadil Fjord	56.1932	8.13383	1994-03-17	NB	L44	F	A	289001
Vest Stadil Fjord	56.12	8.08	1994-03-17	NB	L45	F	A	262837
Vest Stadil Fjord	56.12	8.08	1994-03-17	NB	L47	F	A	257210
Vest Stadil Fjord	56.12	8.08	1994-03-17	NB	L48	F	A	262839
Vest Stadil Fjord	56.12	8.08	1994-03-17	NB	L49	F	J	262840
Vest Stadil Fjord	56.12	8.08	1994-03-17	NB	L54	F	J	262845
Vest Stadil Fjord	56.12	8.08	1994-03-17	NB	L58	F	A	262847
Vest Stadil Fjord	56.12	8.08	1994-03-17	NB	L59	F	J	262848
Vest Stadil Fjord	56.12	8.08	1994-03-17	NB	L64	F	J	262851
Vest Stadil Fjord	56.12	8.08	1994-03-17	NB	L66	F	A	262853
Vest Stadil Fjord	56.12	8.08	1994-03-17	NB	L67	F	J	262854
Vest Stadil Fjord	56.12	8.08	1994-03-17	NB	L70	F	J	262855
Vest Stadil Fjord	56.12	8.08	1994-03-17	NB	L71	F	J	262856
Vest Stadil Fjord	56.12	8.08	1994-03-17	NB	L72	F	A	262857
Vest Stadil Fjord	56.12	8.08	1994-03-17	NB	L73	F	A	262858
Vest Stadil Fjord	56.12	8.08	1994-03-17	NB	L75	F	A	262860
Vest Stadil Fjord	56.12	8.08	1994-03-17	NB	L82	F	J	262865
Vest Stadil Fjord	56.12	8.08	1994-03-17	NB	L85	F	A	262868
Vest Stadil Fjord	56.12	8.08	1994-03-17	NB	L87	F	A	262870
Vest Stadil Fjord	56.12	8.08	1994-03-17	NB	N04	F	A	262879
Vest Stadil Fjord	56.12	8.08	1994-03-17	NB	N05	F	A	257220
Vest Stadil Fjord	56.12	8.08	1994-03-17	NB	N06	F	A	262880
Vest Stadil Fjord	56.12	8.08	1994-03-17	NB	N07	F	A	262881
Vest Stadil Fjord	56.12	8.08	1994-03-17	NB	K82	M	A	262795
Vest Stadil Fjord	56.12	8.08	1994-03-17	NB	K86	M	A	262799
Vest Stadil Fjord	56.12	8.08	1994-03-17	NB	K92	M	A	257233
Vest Stadil Fjord	56.12	8.08	1994-03-17	NB	K95	M	J	262803
Vest Stadil Fjord	56.12	8.08	1994-03-17	NB	L07	M	J	257230
Vest Stadil Fjord	56.12	8.08	1994-03-17	NB	L09	M	J	262808
Vest Stadil Fjord	56.12	8.08	1994-03-17	NB	L10	M	A	262809
Vest Stadil Fjord	56.12	8.08	1994-03-17	NB	L13	M	J	262811
Vest Stadil Fjord	56.12	8.08	1994-03-17	NB	L16	M	J	257006
Vest Stadil Fjord	56.12	8.08	1994-03-17	NB	L17	M	A	262814
Vest Stadil Fjord	56.12	8.08	1994-03-17	NB	L20	M	J	262816
Vest Stadil Fjord	56.12	8.08	1994-03-17	NB	L23	M	A	262819
Vest Stadil Fjord	56.12	8.08	1994-03-17	NB	L25	M	A	262821
Vest Stadil Fjord	56.12	8.08	1994-03-17	NB	L26	M	A	262822
Vest Stadil Fjord	56.12	8.08	1994-03-17	NB	L30	M	A	262825
Vest Stadil Fjord	56.12	8.08	1994-03-17	NB	L31	M	A	262826
Vest Stadil Fjord	56.12	8.08	1994-03-17	NB	L35	M	A	262829
Vest Stadil Fjord	56.12	8.08	1994-03-17	NB	L39	M	A	257234
Vest Stadil Fjord	56.12	8.08	1994-03-17	NB	L40	M	A	262833
Vest Stadil Fjord	56.12	8.08	1994-03-17	NB	L41	M	A	262834
Vest Stadil Fjord	56.12	8.08	1994-03-17	NB	L50	M	J	262841
Vest Stadil Fjord	56.12	8.08	1994-03-17	NB	L51	M	A	262842
Vest Stadil Fjord	56.12	8.08	1994-03-17	NB	L52	M	A	262843
Vest Stadil Fjord	56.12	8.08	1994-03-17	NB	L56	M	J	257228
Vest Stadil Fjord	56.12	8.08	1994-03-17	NB	L57	M	A	257231
Vest Stadil Fjord	56.12	8.08	1994-03-17	NB	L62	M	J	262849
Vest Stadil Fjord	56.12	8.08	1994-03-17	NB	L63	M	J	262850
Vest Stadil Fjord	56.12	8.08	1994-03-17	NB	L65	M	A	262852
Vest Stadil Fjord	56.12	8.08	1994-03-17	NB	L69	M	J	257226
Vest Stadil Fjord	56.12	8.08	1994-03-17	NB	L74	M	A	262859
Vest Stadil Fjord	56.12	8.08	1994-03-17	NB	L76	M	A	262861
Vest Stadil Fjord	56.12	8.08	1994-03-17	NB	L78	M	A	262863
Vest Stadil Fjord	56.12	8.08	1994-03-17	NB	L83	M	J	262866
Vest Stadil Fjord	56.12	8.08	1994-03-17	NB	L86	M	A	262869
Vest Stadil Fjord	56.12	8.08	1994-03-17	NB	L88	M	A	262871
Vest Stadil Fjord	56.12	8.08	1994-03-17	NB	L93	M	A	262873
Vest Stadil Fjord	56.12	8.08	1994-03-17	NB	L97	M	A	262876
Loch Leven	56.12	3.22	1995-03-14	NB	SV	M	A	262882
Vest Stadil Fjord	56.12	8.08	1995-05-01	NB	O05	F	A	262885
Vest Stadil Fjord	56.12	8.08	1995-05-01	NB	O07	F	J	262886
Vest Stadil Fjord	56.12	8.08	1995-05-01	NB	O15	F	J	262893
Vest Stadil Fjord	56.12	8.08	1995-05-01	NB	O20	F	J	257007
Vest Stadil Fjord	56.12	8.08	1995-05-01	NB	O21	F	J	262896
Vest Stadil Fjord	56.12	8.08	1995-05-01	NB	O23	F	J	262897
Vest Stadil Fjord	56.12	8.08	1995-05-01	NB	O24	F	J	262898
Vest Stadil Fjord	56.12	8.08	1995-05-01	NB	O25	F	A	262899
Vest Stadil Fjord	56.12	8.08	1995-05-01	NB	O30	F	A	262901
Vest Stadil Fjord	56.12	8.08	1995-05-01	NB	O32	F	A	262903
Vest Stadil Fjord	56.12	8.08	1995-05-01	NB	O37	F	A	262907
Vest Stadil Fjord	56.12	8.08	1995-05-01	NB	O38	F	J	262908
Vest Stadil Fjord	56.12	8.08	1995-05-01	NB	O44	F	J	262913
Vest Stadil Fjord	56.12	8.08	1995-05-01	NB	O55	F	A	262922
Vest Stadil Fjord	56.12	8.08	1995-05-01	NB	O74	F	A	262931
Vest Stadil Fjord	56.12	8.08	1995-05-01	NB	O75	F	A	262932
Vest Stadil Fjord	56.12	8.08	1995-05-01	NB	O77	F	J	262933
Vest Stadil Fjord	56.12	8.08	1995-05-01	NB	O84	F	A	262937
Vest Stadil Fjord	56.12	8.08	1995-05-01	NB	O93	F	A	262941
Vest Stadil Fjord	56.12	8.08	1995-05-01	NB	O94	F	A	262942
Vest Stadil Fjord	56.12	8.08	1995-05-01	NB	S02	F	A	262945
Vest Stadil Fjord	56.12	8.08	1995-05-01	NB	S10	F	A	262950
Vest Stadil Fjord	56.12	8.08	1995-05-01	NB	S13	F	A	262953
Vest Stadil Fjord	56.12	8.08	1995-05-01	NB	S14	F	A	262954
Vest Stadil Fjord	56.12	8.08	1995-05-01	NB	S20	F	J	262958
Vest Stadil Fjord	56.12	8.08	1995-05-01	NB	S25	F	A	262962
Vest Stadil Fjord	56.12	8.08	1995-05-01	NB	S32	F	A	262967
Vest Stadil Fjord	56.12	8.08	1995-05-01	NB	S38	F	A	262983
Vest Stadil Fjord	56.12	8.08	1995-05-01	NB	S42	F	A	262986
Vest Stadil Fjord	56.12	8.08	1995-05-01	NB	S44	F	A	257221
Vest Stadil Fjord	56.12	8.08	1995-05-01	NB	S54	F	J	262994
Vest Stadil Fjord	56.12	8.08	1995-05-01	NB	S58	F	A	251839
Vest Stadil Fjord	56.12	8.08	1995-05-01	NB	S71	F	J	262998
Vest Stadil Fjord	56.12	8.08	1995-05-01	NB	S72	F	A	262999
Vest Stadil Fjord	56.12	8.08	1995-05-01	NB	S75	F	A	263002
Vest Stadil Fjord	56.12	8.08	1995-05-01	NB	S77	F	A	263004
Vest Stadil Fjord	56.12	8.08	1995-05-01	NB	S87	F	A	263010
Vest Stadil Fjord	56.12	8.08	1995-05-01	NB	S88	F	A	263011
Vest Stadil Fjord	56.12	8.08	1995-05-01	NB	S94	F	A	263014
Vest Stadil Fjord	56.1929	8.13289	1995-05-01	NB	O03	M	A	298823
Vest Stadil Fjord	56.12	8.08	1995-05-01	NB	O12	M	A	262890
Vest Stadil Fjord	56.12	8.08	1995-05-01	NB	O17	M	J	262894
Vest Stadil Fjord	56.12	8.08	1995-05-01	NB	O18	M	J	262895
Vest Stadil Fjord	56.12	8.08	1995-05-01	NB	O28	M	A	262900
Vest Stadil Fjord	56.12	8.08	1995-05-01	NB	O33	M	A	262904
Vest Stadil Fjord	56.12	8.08	1995-05-01	NB	O34	M	J	262905
Vest Stadil Fjord	56.12	8.08	1995-05-01	NB	O35	M	A	262906
Vest Stadil Fjord	56.12	8.08	1995-05-01	NB	O40	M	A	262909
Vest Stadil Fjord	56.12	8.08	1995-05-01	NB	O41	M	A	262910
Vest Stadil Fjord	56.12	8.08	1995-05-01	NB	O43	M	A	262912
Vest Stadil Fjord	56.12	8.08	1995-05-01	NB	O47	M	J	262915
Vest Stadil Fjord	56.12	8.08	1995-05-01	NB	O48	M	A	262916
Vest Stadil Fjord	56.12	8.08	1995-05-01	NB	O51	M	A	262918
Vest Stadil Fjord	56.12	8.08	1995-05-01	NB	O52	M	A	262919
Vest Stadil Fjord	56.12	8.08	1995-05-01	NB	O53	M	J	262920
Vest Stadil Fjord	56.12	8.08	1995-05-01	NB	O54	M	J	262921
Vest Stadil Fjord	56.12	8.08	1995-05-01	NB	O56	M	A	262923
Vest Stadil Fjord	56.12	8.08	1995-05-01	NB	O57	M	A	262924
Vest Stadil Fjord	56.12	8.08	1995-05-01	NB	O58	M	A	262925
Vest Stadil Fjord	56.12	8.08	1995-05-01	NB	O70	M	J	262927
Vest Stadil Fjord	56.12	8.08	1995-05-01	NB	O78	M	A	262934
Vest Stadil Fjord	56.12	8.08	1995-05-01	NB	O82	M	J	262935
Vest Stadil Fjord	56.12	8.08	1995-05-01	NB	O83	M	J	262936
Vest Stadil Fjord	56.12	8.08	1995-05-01	NB	O85	M	A	262938
Vest Stadil Fjord	56.12	8.08	1995-05-01	NB	O88	M	A	262940
Vest Stadil Fjord	56.12	8.08	1995-05-01	NB	O95	M	A	262943
Vest Stadil Fjord	56.12	8.08	1995-05-01	NB	O96	M	A	262944
Vest Stadil Fjord	56.12	8.08	1995-05-01	NB	S03	M	A	262946
Vest Stadil Fjord	56.12	8.08	1995-05-01	NB	S04	M	A	262947
Vest Stadil Fjord	56.12	8.08	1995-05-01	NB	S05	M	A	262948
Vest Stadil Fjord	56.12	8.08	1995-05-01	NB	S07	M	A	262949
Vest Stadil Fjord	56.12	8.08	1995-05-01	NB	S08	M	J	257224
Vest Stadil Fjord	56.12	8.08	1995-05-01	NB	S11	M	J	262951
Vest Stadil Fjord	56.12	8.08	1995-05-01	NB	S12	M	J	262952
Vest Stadil Fjord	56.12	8.08	1995-05-01	NB	S15	M	J	262955
Vest Stadil Fjord	56.12	8.08	1995-05-01	NB	S17	M	A	262956
Vest Stadil Fjord	56.12	8.08	1995-05-01	NB	S21	M	A	262959
Vest Stadil Fjord	56.12	8.08	1995-05-01	NB	S22	M	A	257222
Vest Stadil Fjord	56.12	8.08	1995-05-01	NB	S23	M	A	262960
Vest Stadil Fjord	56.12	8.08	1995-05-01	NB	S24	M	J	262961
Vest Stadil Fjord	56.12	8.08	1995-05-01	NB	S27	M	A	262963
Vest Stadil Fjord	56.12	8.08	1995-05-01	NB	S30	M	J	262965
Vest Stadil Fjord	56.12	8.08	1995-05-01	NB	S34	M	A	262969
Vest Stadil Fjord	56.12	8.08	1995-05-01	NB	S35	M	A	262981
Vest Stadil Fjord	56.12	8.08	1995-05-01	NB	S37	M	A	262982
Vest Stadil Fjord	56.12	8.08	1995-05-01	NB	S41	M	A	262985
Vest Stadil Fjord	56.12	8.08	1995-05-01	NB	S45	M	J	262988
Vest Stadil Fjord	56.12	8.08	1995-05-01	NB	S49	M	A	262990
Vest Stadil Fjord	56.12	8.08	1995-05-01	NB	S51	M	J	262992
Vest Stadil Fjord	56.12	8.08	1995-05-01	NB	S55	M	J	262995
Vest Stadil Fjord	56.12	8.08	1995-05-01	NB	S57	M	A	262996
Vest Stadil Fjord	56.12	8.08	1995-05-01	NB	S62	M	A	262997
Vest Stadil Fjord	56.1929	8.13289	1995-05-01	NB	S70	M	A	288141
Vest Stadil Fjord	56.12	8.08	1995-05-01	NB	S73	M	A	263000
Vest Stadil Fjord	56.12	8.08	1995-05-01	NB	S74	M	A	263001
Vest Stadil Fjord	56.12	8.08	1995-05-01	NB	S78	M	A	263005
Vest Stadil Fjord	56.12	8.08	1995-05-01	NB	S84	M	A	263008
Vest Stadil Fjord	56.12	8.08	1995-05-01	NB	S93	M	A	263013
Vest Stadil Fjord	56.12	8.08	1998-03-17	NB	N25	F	A	263017
Vest Stadil Fjord	56.12	8.08	1998-03-17	NB	N26	F	J	263018
Vest Stadil Fjord	56.12	8.08	1998-03-17	NB	N27	F	J	263019
Vest Stadil Fjord	56.12	8.08	1998-03-17	NB	N30	F	A	263022
Vest Stadil Fjord	56.12	8.08	1998-03-17	NB	N35	F	A	263027
Vest Stadil Fjord	56.12	8.08	1998-03-17	NB	N38	F	A	263029
Vest Stadil Fjord	56.12	8.08	1998-03-17	NB	N43	F	A	263034
Vest Stadil Fjord	56.12	8.08	1998-03-17	NB	N44	F	A	263035
Vest Stadil Fjord	56.12	8.08	1998-03-17	NB	N46	F	A	263037
Vest Stadil Fjord	56.12	8.08	1998-03-17	NB	N49	F	A	263040
Vest Stadil Fjord	56.12	8.08	1998-03-17	NB	N50	F	A	263041
Vest Stadil Fjord	56.12	8.08	1998-03-17	NB	N55	F	J	263045
Vest Stadil Fjord	56.12	8.08	1998-03-17	NB	N64	F	A	257276
Vest Stadil Fjord	56.12	8.08	1998-03-17	NB	T04	F	J	263052
Vest Stadil Fjord	56.12	8.08	1998-03-17	NB	T07	F	A	263053
Vest Stadil Fjord	56.12	8.08	1998-03-17	NB	T14	F	A	263056
Vest Stadil Fjord	56.12	8.08	1998-03-17	NB	T15	F	A	263057
Vest Stadil Fjord	56.12	8.08	1998-03-17	NB	T20	F	A	263059
Vest Stadil Fjord	56.12	8.08	1998-03-17	NB	T24	F	J	263063
Vest Stadil Fjord	56.12	8.08	1998-03-17	NB	T26	F	J	263065
Vest Stadil Fjord	56.12	8.08	1998-03-17	NB	T27	F	A	263066
Vest Stadil Fjord	56.12	8.08	1998-03-17	NB	T29	F	A	263068
Vest Stadil Fjord	56.12	8.08	1998-03-17	NB	T33	F	J	263072
Vest Stadil Fjord	56.12	8.08	1998-03-17	NB	T36	F	A	263075
Vest Stadil Fjord	56.12	8.08	1998-03-17	NB	T38	F	A	263077
Vest Stadil Fjord	56.12	8.08	1998-03-17	NB	T40	F	J	263079
Vest Stadil Fjord	56.12	8.08	1998-03-17	NB	T42	F	A	263081
Vest Stadil Fjord	56.12	8.08	1998-03-17	NB	T43	F	J	263082
Vest Stadil Fjord	56.12	8.08	1998-03-17	NB	T47	F	A	263086
Vest Stadil Fjord	56.12	8.08	1998-03-17	NB	T49	F	A	263088
Vest Stadil Fjord	56.12	8.08	1998-03-17	NB	T50	F	A	263089
Vest Stadil Fjord	56.12	8.08	1998-03-17	NB	T52	F	J	263091
Vest Stadil Fjord	56.12	8.08	1998-03-17	NB	T55	F	A	263093
Vest Stadil Fjord	56.12	8.08	1998-03-17	NB	T57	F	J	263095
Vest Stadil Fjord	56.12	8.08	1998-03-17	NB	T63	F	J	263099
Vest Stadil Fjord	56.12	8.08	1998-03-17	NB	T67	F	A	263102
Vest Stadil Fjord	56.12	8.08	1998-03-17	NB	T72	F	J	263104
Vest Stadil Fjord	56.12	8.08	1998-03-17	NB	T74	F	A	263106
Vest Stadil Fjord	56.12	8.08	1998-03-17	NB	T75	F	A	252488
Vest Stadil Fjord	56.12	8.08	1998-03-17	NB	T93	F	J	263119
Vest Stadil Fjord	56.12	8.08	1998-03-17	NB	U12	F	A	263128
Vest Stadil Fjord	56.12	8.08	1998-03-17	NB	U17	F	A	263132
Vest Stadil Fjord	56.12	8.08	1998-03-17	NB	U21	F	J	263133
Vest Stadil Fjord	56.12	8.08	1998-03-17	NB	U23	F	A	263135
Vest Stadil Fjord	56.12	8.08	1998-03-17	NB	U29	F	A	263140
Vest Stadil Fjord	56.12	8.08	1998-03-17	NB	U31	F	A	252892
Vest Stadil Fjord	56.12	8.08	1998-03-17	NB	U32	F	A	257243
Vest Stadil Fjord	56.12	8.08	1998-03-17	NB	U34	F	A	263143
Vest Stadil Fjord	56.12	8.08	1998-03-17	NB	U35	F	A	263144
Vest Stadil Fjord	56.12	8.08	1998-03-17	NB	U50	F	A	263159
Vest Stadil Fjord	56.12	8.08	1998-03-17	NB	U53	F	A	263162
Vest Stadil Fjord	56.12	8.08	1998-03-17	NB	U57	F	A	263166
Vest Stadil Fjord	56.12	8.08	1998-03-17	NB	U58	F	A	263167
Vest Stadil Fjord	56.12	8.08	1998-03-17	NB	U72	F	A	263175
Vest Stadil Fjord	56.12	8.08	1998-03-17	NB	U73	F	A	263176
Vest Stadil Fjord	56.12	8.08	1998-03-17	NB	U74	F	A	263177
Vest Stadil Fjord	56.12	8.08	1998-03-17	NB	U78	F	A	263181
Vest Stadil Fjord	56.12	8.08	1998-03-17	NB	U83	F	A	263184
Vest Stadil Fjord	56.12	8.08	1998-03-17	NB	U84	F	J	263185
Vest Stadil Fjord	56.12	8.08	1998-03-17	NB	U88	F	A	263188
Vest Stadil Fjord	56.12	8.08	1998-03-17	NB	U97	F	A	263193
Vest Stadil Fjord	56.12	8.08	1998-03-17	NB	X05	F	A	263197
Vest Stadil Fjord	56.12	8.08	1998-03-17	NB	X11	F	A	263199
Vest Stadil Fjord	56.12	8.08	1998-03-17	NB	X14	F	J	263202
Vest Stadil Fjord	56.12	8.08	1998-03-17	NB	X21	F	A	263206
Vest Stadil Fjord	56.12	8.08	1998-03-17	NB	X32	F	A	263216
Vest Stadil Fjord	56.12	8.08	1998-03-17	NB	X33	F	A	263217
Vest Stadil Fjord	56.12	8.08	1998-03-17	NB	X36	F	A	263220
Vest Stadil Fjord	56.12	8.08	1998-03-17	NB	X40	F	A	263224
Vest Stadil Fjord	56.12	8.08	1998-03-17	NB	X42	F	A	263226
Vest Stadil Fjord	56.12	8.08	1998-03-17	NB	X45	F	A	263229
Vest Stadil Fjord	56.12	8.08	1998-03-17	NB	X56	F	A	257275
Vest Stadil Fjord	56.12	8.08	1998-03-17	NB	X57	F	A	263239
Vest Stadil Fjord	56.12	8.08	1998-03-17	NB	X73	F	J	263250
Vest Stadil Fjord	56.12	8.08	1998-03-17	NB	X76	F	A	263253
Vest Stadil Fjord	56.12	8.08	1998-03-17	NB	X82	F	A	263257
Vest Stadil Fjord	56.12	8.08	1998-03-17	NB	X85	F	A	263260
Vest Stadil Fjord	56.12	8.08	1998-03-17	NB	X87	F	A	263261
Vest Stadil Fjord	56.12	8.08	1998-03-17	NB	X88	F	J	263262
Vest Stadil Fjord	56.12	8.08	1998-03-17	NB	Y02	F	A	263266
Vest Stadil Fjord	56.12	8.08	1998-03-17	NB	Y04	F	A	263268
Vest Stadil Fjord	56.12	8.08	1998-03-17	NB	Y07	F	A	263270
Vest Stadil Fjord	56.12	8.08	1998-03-17	NB	Y11	F	A	263271
Vest Stadil Fjord	56.12	8.08	1998-03-17	NB	Y22	F	A	263278
Vest Stadil Fjord	56.12	8.08	1998-03-17	NB	Y30	F	A	263284
Vest Stadil Fjord	56.12	8.08	1998-03-17	NB	Y35	F	A	263289
Vest Stadil Fjord	56.12	8.08	1998-03-17	NB	Y36	F	A	263290
Vest Stadil Fjord	56.12	8.08	1998-03-17	NB	Y37	F	A	263291
Vest Stadil Fjord	56.12	8.08	1998-03-17	NB	Y43	F	J	263297
Vest Stadil Fjord	56.12	8.08	1998-03-17	NB	Y46	F	A	263300
Vest Stadil Fjord	56.12	8.08	1998-03-17	NB	Y52	F	A	252433
Vest Stadil Fjord	56.12	8.08	1998-03-17	NB	Y56	F	A	252442
Vest Stadil Fjord	56.12	8.08	1998-03-17	NB	Y58	F	A	263309
Vest Stadil Fjord	56.12	8.08	1998-03-17	NB	Y64	F	A	263313
Vest Stadil Fjord	56.12	8.08	1998-03-17	NB	Y65	F	J	263314
Vest Stadil Fjord	56.12	8.08	1998-03-17	NB	Y72	F	A	263316
Vest Stadil Fjord	56.12	8.08	1998-03-17	NB	Y73	F	A	263317
Vest Stadil Fjord	56.12	8.08	1998-03-17	NB	Y82	F	A	263324
Vest Stadil Fjord	56.12	8.08	1998-03-17	NW	I45	M	A	274024
Vest Stadil Fjord	56.12	8.08	1998-03-17	NB	N31	M	J	263023
Vest Stadil Fjord	56.12	8.08	1998-03-17	NB	N32	M	A	263024
Vest Stadil Fjord	56.12	8.08	1998-03-17	NB	N33	M	A	263025
Vest Stadil Fjord	56.12	8.08	1998-03-17	NB	N34	M	A	263026
Vest Stadil Fjord	56.12	8.08	1998-03-17	NB	N37	M	J	263028
Vest Stadil Fjord	56.12	8.08	1998-03-17	NB	N40	M	A	263031
Vest Stadil Fjord	56.12	8.08	1998-03-17	NB	N51	M	A	298815
Vest Stadil Fjord	56.12	8.08	1998-03-17	NB	N53	M	A	263043
Vest Stadil Fjord	56.12	8.08	1998-03-17	NB	N54	M	A	263044
Vest Stadil Fjord	56.12	8.08	1998-03-17	NB	N56	M	A	263046
Vest Stadil Fjord	56.12	8.08	1998-03-17	NB	N57	M	J	257242
Vest Stadil Fjord	56.12	8.08	1998-03-17	NB	N58	M	A	263047
Vest Stadil Fjord	56.12	8.08	1998-03-17	NB	P03	M	A	298805
Vest Stadil Fjord	56.12	8.08	1998-03-17	NB	T03	M	J	263051
Vest Stadil Fjord	56.12	8.08	1998-03-17	NB	T12	M	J	263054
Vest Stadil Fjord	56.12	8.08	1998-03-17	NB	T21	M	A	263060
Vest Stadil Fjord	56.12	8.08	1998-03-17	NB	T28	M	A	263067
Vest Stadil Fjord	56.12	8.08	1998-03-17	NB	T31	M	A	263070
Vest Stadil Fjord	56.12	8.08	1998-03-17	NB	T39	M	J	263078
Vest Stadil Fjord	56.12	8.08	1998-03-17	NB	T48	M	A	263087
Vest Stadil Fjord	56.12	8.08	1998-03-17	NB	T51	M	A	263090
Vest Stadil Fjord	56.12	8.08	1998-03-17	NB	T53	M	J	258221
Vest Stadil Fjord	56.12	8.08	1998-03-17	NB	T54	M	A	263092
Vest Stadil Fjord	56.12	8.08	1998-03-17	NB	T58	M	A	263096
Vest Stadil Fjord	56.12	8.08	1998-03-17	NB	T59	M	A	263097
Vest Stadil Fjord	56.12	8.08	1998-03-17	NB	T62	M	A	263098
Vest Stadil Fjord	56.12	8.08	1998-03-17	NB	T64	M	A	263100
Vest Stadil Fjord	56.12	8.08	1998-03-17	NB	T76	M	A	263107
Vest Stadil Fjord	56.12	8.08	1998-03-17	NB	T83	M	J	263112
Vest Stadil Fjord	56.12	8.08	1998-03-17	NB	T84	M	J	263113
Vest Stadil Fjord	56.12	8.08	1998-03-17	NB	T86	M	J	263115
Vest Stadil Fjord	56.12	8.08	1998-03-17	NB	T87	M	J	263116
Vest Stadil Fjord	56.12	8.08	1998-03-17	NB	T97	M	A	263121
Vest Stadil Fjord	56.12	8.08	1998-03-17	NB	U03	M	J	263123
Vest Stadil Fjord	56.12	8.08	1998-03-17	NB	U04	M	A	263124
Vest Stadil Fjord	56.12	8.08	1998-03-17	NB	U07	M	A	263126
Vest Stadil Fjord	56.12	8.08	1998-03-17	NB	U11	M	A	263127
Vest Stadil Fjord	56.12	8.08	1998-03-17	NB	U25	M	A	263137
Vest Stadil Fjord	56.12	8.08	1998-03-17	NB	U27	M	A	263139
Vest Stadil Fjord	56.12	8.08	1998-03-17	NB	U28	M	A	289021
Vest Stadil Fjord	56.12	8.08	1998-03-17	NB	U30	M	A	263141
Vest Stadil Fjord	56.12	8.08	1998-03-17	NB	U33	M	A	263142
Vest Stadil Fjord	56.12	8.08	1998-03-17	NB	U36	M	A	263145
Vest Stadil Fjord	56.12	8.08	1998-03-17	NB	U37	M	A	263146
Vest Stadil Fjord	56.12	8.08	1998-03-17	NB	U38	M	J	263147
Vest Stadil Fjord	56.12	8.08	1998-03-17	NB	U39	M	A	263148
Vest Stadil Fjord	56.12	8.08	1998-03-17	NB	U44	M	J	263153
Vest Stadil Fjord	56.12	8.08	1998-03-17	NB	U45	M	A	263154
Vest Stadil Fjord	56.12	8.08	1998-03-17	NB	U46	M	A	263155
Vest Stadil Fjord	56.12	8.08	1998-03-17	NB	U51	M	A	263160
Vest Stadil Fjord	56.12	8.08	1998-03-17	NB	U54	M	A	263163
Vest Stadil Fjord	56.12	8.08	1998-03-17	NB	U56	M	A	263165
Vest Stadil Fjord	56.12	8.08	1998-03-17	NB	U59	M	A	263168
Vest Stadil Fjord	56.12	8.08	1998-03-17	NB	U65	M	J	263171
Vest Stadil Fjord	56.12	8.08	1998-03-17	NB	U67	M	A	263172
Vest Stadil Fjord	56.12	8.08	1998-03-17	NB	U70	M	A	263173
Vest Stadil Fjord	56.12	8.08	1998-03-17	NB	U85	M	A	263186
Vest Stadil Fjord	56.12	8.08	1998-03-17	NB	U94	M	A	263191
Vest Stadil Fjord	56.12	8.08	1998-03-17	NB	U95	M	A	263192
Vest Stadil Fjord	56.12	8.08	1998-03-17	NB	X02	M	A	263194
Vest Stadil Fjord	56.12	8.08	1998-03-17	NB	X04	M	A	263196
Vest Stadil Fjord	56.12	8.08	1998-03-17	NB	X07	M	A	263198
Vest Stadil Fjord	56.12	8.08	1998-03-17	NB	X13	M	J	263201
Vest Stadil Fjord	56.12	8.08	1998-03-17	NB	X17	M	A	263204
Vest Stadil Fjord	56.12	8.08	1998-03-17	NB	X20	M	A	263205
Vest Stadil Fjord	56.12	8.08	1998-03-17	NB	X22	M	J	263207
Vest Stadil Fjord	56.12	8.08	1998-03-17	NB	X25	M	A	263209
Vest Stadil Fjord	56.12	8.08	1998-03-17	NB	X34	M	A	263218
Vest Stadil Fjord	56.12	8.08	1998-03-17	NB	X35	M	A	263219
Vest Stadil Fjord	56.12	8.08	1998-03-17	NB	X38	M	A	263222
Vest Stadil Fjord	56.12	8.08	1998-03-17	NB	X39	M	A	263223
Vest Stadil Fjord	56.12	8.08	1998-03-17	NB	X41	M	A	263225
Vest Stadil Fjord	56.12	8.08	1998-03-17	NB	X44	M	J	263228
Vest Stadil Fjord	56.12	8.08	1998-03-17	NB	X48	M	A	263232
Vest Stadil Fjord	56.12	8.08	1998-03-17	NB	X51	M	A	263234
Vest Stadil Fjord	56.12	8.08	1998-03-17	NB	X52	M	J	263235
Vest Stadil Fjord	56.12	8.08	1998-03-17	NB	X53	M	J	263236
Vest Stadil Fjord	56.12	8.08	1998-03-17	NB	X54	M	A	263237
Vest Stadil Fjord	56.12	8.08	1998-03-17	NB	X58	M	A	263240
Vest Stadil Fjord	56.12	8.08	1998-03-17	NB	X65	M	A	263245
Vest Stadil Fjord	56.12	8.08	1998-03-17	NB	X70	M	J	263247
Vest Stadil Fjord	56.12	8.08	1998-03-17	NB	X77	M	A	263254
Vest Stadil Fjord	56.12	8.08	1998-03-17	NB	X79	M	A	263256
Vest Stadil Fjord	56.12	8.08	1998-03-17	NB	X84	M	A	263259
Vest Stadil Fjord	56.12	8.08	1998-03-17	NB	X92	M	A	263263
Vest Stadil Fjord	56.12	8.08	1998-03-17	NB	X93	M	A	257244
Vest Stadil Fjord	56.12	8.08	1998-03-17	NB	Y03	M	A	263267
Vest Stadil Fjord	56.12	8.08	1998-03-17	NB	Y13	M	A	263273
Vest Stadil Fjord	56.12	8.08	1998-03-17	NB	Y14	M	J	263274
Vest Stadil Fjord	56.12	8.08	1998-03-17	NB	Y15	M	J	258219
Vest Stadil Fjord	56.12	8.08	1998-03-17	NB	Y17	M	A	263275
Vest Stadil Fjord	56.12	8.08	1998-03-17	NB	Y27	M	A	257236
Vest Stadil Fjord	56.12	8.08	1998-03-17	NB	Y28	M	A	263282
Vest Stadil Fjord	56.12	8.08	1998-03-17	NB	Y31	M	A	263285
Vest Stadil Fjord	56.12	8.08	1998-03-17	NB	Y32	M	A	263286
Vest Stadil Fjord	56.12	8.08	1998-03-17	NB	Y38	M	A	263292
Vest Stadil Fjord	56.12	8.08	1998-03-17	NB	Y39	M	J	263293
Vest Stadil Fjord	56.12	8.08	1998-03-17	NB	Y47	M	J	257235
Vest Stadil Fjord	56.12	8.08	1998-03-17	NB	Y50	M	A	263303
Vest Stadil Fjord	56.12	8.08	1998-03-17	NB	Y53	M	A	263305
Vest Stadil Fjord	56.12	8.08	1998-03-17	NB	Y59	M	A	263310
Vest Stadil Fjord	56.12	8.08	1998-03-17	NB	Y62	M	A	263311
Vest Stadil Fjord	56.12	8.08	1998-03-17	NB	Y63	M	A	263312
Vest Stadil Fjord	56.12	8.08	1998-03-17	NB	Y67	M	A	251711
Vest Stadil Fjord	56.12	8.08	1998-03-17	NB	Y71	M	A	263315
Vest Stadil Fjord	56.12	8.08	1998-03-17	NB	Y74	M	A	263318
Vest Stadil Fjord	56.12	8.08	1998-03-17	NB	Y75	M	J	263319
Vest Stadil Fjord	56.12	8.08	1998-03-17	NB	Y83	M	A	263325
Vest Stadil Fjord	56.12	8.08	1998-03-17	NB	Y87	M	A	263329
Vest Stadil Fjord	56.12	8.08	1998-03-17	NB	Y93	M	A	263332
Vest Stadil Fjord	56.12	8.08	1998-03-17	NB	Y95	M	A	263334
Vest Stadil Fjord	56.12	8.08	2000-03-21	NB	M05	F	A	263339
Vest Stadil Fjord	56.12	8.08	2000-03-21	NB	M13	F	A	263343
Vest Stadil Fjord	56.12	8.08	2000-03-21	NB	M23	F	A	263349
Vest Stadil Fjord	56.12	8.08	2000-03-21	NB	M27	F	A	263353
Vest Stadil Fjord	56.12	8.08	2000-03-21	NB	M28	F	A	263354
Vest Stadil Fjord	56.12	8.08	2000-03-21	NB	M29	F	A	263355
Vest Stadil Fjord	56.12	8.08	2000-03-21	NB	M35	F	A	263361
Vest Stadil Fjord	56.12	8.08	2000-03-21	NB	M37	F	A	263363
Vest Stadil Fjord	56.12	8.08	2000-03-21	NB	M40	F	A	263365
Vest Stadil Fjord	56.12	8.08	2000-03-21	NB	M45	F	J	263370
Vest Stadil Fjord	56.12	8.08	2000-03-21	NB	M47	F	A	257240
Vest Stadil Fjord	56.12	8.08	2000-03-21	NB	M48	F	A	263372
Vest Stadil Fjord	56.12	8.08	2000-03-21	NB	M51	F	A	263375
Vest Stadil Fjord	56.12	8.08	2000-03-21	NB	M55	F	A	263379
Vest Stadil Fjord	56.12	8.08	2000-03-21	NB	M56	F	A	263380
Vest Stadil Fjord	56.12	8.08	2000-03-21	NB	M57	F	A	263381
Vest Stadil Fjord	56.12	8.08	2000-03-21	NB	M58	F	A	257241
Vest Stadil Fjord	56.12	8.08	2000-03-21	NB	M67	F	A	263386
Vest Stadil Fjord	56.12	8.08	2000-03-21	NB	M73	F	A	263390
Vest Stadil Fjord	56.12	8.08	2000-03-21	NB	M76	F	A	263393
Vest Stadil Fjord	56.12	8.08	2000-03-21	NB	M79	F	J	263396
Vest Stadil Fjord	56.12	8.08	2000-03-21	NB	M83	F	A	263398
Vest Stadil Fjord	56.12	8.08	2000-03-21	NB	P14	F	A	263415
Vest Stadil Fjord	56.12	8.08	2000-03-21	NB	P17	F	A	263417
Vest Stadil Fjord	56.12	8.08	2000-03-21	NB	P25	F	A	263423
Vest Stadil Fjord	56.12	8.08	2000-03-21	NB	P28	F	A	263426
Vest Stadil Fjord	56.12	8.08	2000-03-21	NB	P30	F	A	263428
Vest Stadil Fjord	56.12	8.08	2000-03-21	NB	P32	F	A	263430
Vest Stadil Fjord	56.12	8.08	2000-03-21	NB	P36	F	J	263434
Vest Stadil Fjord	56.12	8.08	2000-03-21	NB	P37	F	A	263435
Vest Stadil Fjord	56.12	8.08	2000-03-21	NB	P38	F	J	263436
Vest Stadil Fjord	56.12	8.08	2000-03-21	NB	P39	F	A	263437
Vest Stadil Fjord	56.12	8.08	2000-03-21	NB	P40	F	A	263438
Vest Stadil Fjord	56.12	8.08	2000-03-21	NB	P46	F	A	263444
Vest Stadil Fjord	56.12	8.08	2000-03-21	NB	P47	F	J	263445
Vest Stadil Fjord	56.12	8.08	2000-03-21	NB	P49	F	A	263447
Vest Stadil Fjord	56.12	8.08	2000-03-21	NB	P53	F	A	252489
Vest Stadil Fjord	56.12	8.08	2000-03-21	NB	P72	F	A	263463
Vest Stadil Fjord	56.12	8.08	2000-03-21	NB	P73	F	J	263464
Vest Stadil Fjord	56.12	8.08	2000-03-21	NB	P75	F	A	263466
Vest Stadil Fjord	56.12	8.08	2000-03-21	NB	P78	F	A	251900
Vest Stadil Fjord	56.12	8.08	2000-03-21	NB	P83	F	A	263471
Vest Stadil Fjord	56.12	8.08	2000-03-21	NB	P85	F	A	263473
Vest Stadil Fjord	56.12	8.08	2000-03-21	NB	P93	F	A	263477
Vest Stadil Fjord	56.12	8.08	2000-03-21	NB	M04	M	A	263338
Vest Stadil Fjord	56.12	8.08	2000-03-21	NB	M07	M	A	263340
Vest Stadil Fjord	56.12	8.08	2000-03-21	NB	M12	M	A	263342
Vest Stadil Fjord	56.12	8.08	2000-03-21	NB	M15	M	A	263345
Vest Stadil Fjord	56.12	8.08	2000-03-21	NB	M17	M	A	263346
Vest Stadil Fjord	56.12	8.08	2000-03-21	NB	M20	M	A	298821
Vest Stadil Fjord	56.12	8.08	2000-03-21	NB	M22	M	A	263348
Vest Stadil Fjord	56.12	8.08	2000-03-21	NB	M24	M	A	263350
Vest Stadil Fjord	56.12	8.08	2000-03-21	NB	M26	M	J	263352
Vest Stadil Fjord	56.12	8.08	2000-03-21	NB	M31	M	A	263357
Vest Stadil Fjord	56.12	8.08	2000-03-21	NB	M32	M	A	263358
Vest Stadil Fjord	56.12	8.08	2000-03-21	NB	M34	M	A	263360
Vest Stadil Fjord	56.12	8.08	2000-03-21	NB	M36	M	A	263362
Vest Stadil Fjord	56.12	8.08	2000-03-21	NB	M39	M	A	263364
Vest Stadil Fjord	56.12	8.08	2000-03-21	NB	M41	M	A	263366
Vest Stadil Fjord	56.12	8.08	2000-03-21	NB	M52	M	A	263376
Vest Stadil Fjord	56.12	8.08	2000-03-21	NB	M71	M	A	263388
Vest Stadil Fjord	56.12	8.08	2000-03-21	NB	M74	M	A	263391
Vest Stadil Fjord	56.12	8.08	2000-03-21	NB	M75	M	A	263392
Vest Stadil Fjord	56.12	8.08	2000-03-21	NB	M87	M	A	263401
Vest Stadil Fjord	56.12	8.08	2000-03-21	NB	M88	M	A	263402
Vest Stadil Fjord	56.12	8.08	2000-03-21	NB	M93	M	A	263404
Vest Stadil Fjord	56.12	8.08	2000-03-21	NB	M94	M	A	263405
Vest Stadil Fjord	56.12	8.08	2000-03-21	NB	M97	M	A	263407
Vest Stadil Fjord	56.12	8.08	2000-03-21	NB	P02	M	J	263408
Vest Stadil Fjord	56.12	8.08	2000-03-21	NB	P04	M	A	263409
Vest Stadil Fjord	56.12	8.08	2000-03-21	NB	P07	M	A	263411
Vest Stadil Fjord	56.12	8.08	2000-03-21	NB	P11	M	A	263412
Vest Stadil Fjord	56.12	8.08	2000-03-21	NB	P13	M	A	263414
Vest Stadil Fjord	56.12	8.08	2000-03-21	NB	P15	M	A	263416
Vest Stadil Fjord	56.12	8.08	2000-03-21	NB	P20	M	A	263418
Vest Stadil Fjord	56.12	8.08	2000-03-21	NB	P22	M	A	263420
Vest Stadil Fjord	56.12	8.08	2000-03-21	NB	P23	M	A	263421
Vest Stadil Fjord	56.12	8.08	2000-03-21	NB	P26	M	J	263424
Vest Stadil Fjord	56.12	8.08	2000-03-21	NB	P29	M	J	263427
Vest Stadil Fjord	56.12	8.08	2000-03-21	NB	P33	M	J	263431
Vest Stadil Fjord	56.12	8.08	2000-03-21	NB	P35	M	A	263433
Vest Stadil Fjord	56.12	8.08	2000-03-21	NB	P42	M	A	263440
Vest Stadil Fjord	56.12	8.08	2000-03-21	NB	P44	M	A	263442
Vest Stadil Fjord	56.12	8.08	2000-03-21	NB	P45	M	A	263443
Vest Stadil Fjord	56.12	8.08	2000-03-21	NB	P52	M	A	263450
Vest Stadil Fjord	56.12	8.08	2000-03-21	NB	P55	M	J	263452
Vest Stadil Fjord	56.12	8.08	2000-03-21	NB	P57	M	A	263454
Vest Stadil Fjord	56.12	8.08	2000-03-21	NB	P58	M	A	263455
Vest Stadil Fjord	56.12	8.08	2000-03-21	NB	P59	M	A	263456
Vest Stadil Fjord	56.12	8.08	2000-03-21	NB	P62	M	A	263457
Vest Stadil Fjord	56.12	8.08	2000-03-21	NB	P64	M	A	263458
Vest Stadil Fjord	56.12	8.08	2000-03-21	NB	P65	M	A	263459
Vest Stadil Fjord	56.12	8.08	2000-03-21	NB	P71	M	A	263462
Vest Stadil Fjord	56.12	8.08	2000-03-21	NB	P74	M	A	263465
Vest Stadil Fjord	56.12	8.08	2000-03-21	NB	P79	M	A	263469
Vest Stadil Fjord	56.12	8.08	2000-03-21	NB	P84	M	A	263472
Vest Stadil Fjord	56.12	8.08	2000-03-21	NB	P95	M	A	263479
Hovs°r R°n	56.59	8.51	2001-03-15	NB	A41	F	A	263481
Hovs°r R°n	56.59	8.51	2001-03-15	NB	A42	F	A	263482
Hovs°r R°n	56.59	8.51	2001-03-15	NB	A48	F	A	263488
Hovs°r R°n	56.59	8.51	2001-03-15	NB	A51	F	A	252417
Hovs°r R°n	56.59	8.51	2001-03-15	NB	A54	F	A	263493
Hovs°r R°n	56.59	8.51	2001-03-15	NB	A55	F	A	263494
Hovs°r R°n	56.59	8.51	2001-03-15	NB	A59	F	A	263498
Hovs°r R°n	56.59	8.51	2001-03-15	NB	A62	F	A	263499
Hovs°r R°n	56.59	8.51	2001-03-15	NB	A67	F	A	263502
Hovs°r R°n	56.59	8.51	2001-03-15	NB	A70	F	A	252887
Hovs°r R°n	56.59	8.51	2001-03-15	NB	A72	F	A	263504
Hovs°r R°n	56.59	8.51	2001-03-15	NB	A78	F	A	263509
Hovs°r R°n	56.59	8.51	2001-03-15	NB	A82	F	A	263511
Hovs°r R°n	56.59	8.51	2001-03-15	NB	A87	F	A	263514
Hovs°r R°n	56.59	8.51	2001-03-15	NB	A93	F	A	263517
Hovs°r R°n	56.59	8.51	2001-03-15	NB	A97	F	A	263520
Hovs°r R°n	56.59	8.51	2001-03-15	NB	B45	F	A	263525
Hovs°r R°n	56.59	8.51	2001-03-15	NB	B47	F	A	263527
Hovs°r R°n	56.59	8.51	2001-03-15	NB	B49	F	A	263529
Hovs°r R°n	56.59	8.51	2001-03-15	NB	B51	F	A	263531
Hovs°r R°n	56.59	8.51	2001-03-15	NB	B53	F	A	263533
Hovs°r R°n	56.59	8.51	2001-03-15	NB	B58	F	J	263538
Hovs°r R°n	56.59	8.51	2001-03-15	NB	B62	F	A	263540
Hovs°r R°n	56.59	8.51	2001-03-15	NB	B70	F	A	251636
Hovs°r R°n	56.59	8.51	2001-03-15	NB	B71	F	A	263544
Hovs°r R°n	56.59	8.51	2001-03-15	NB	B76	F	A	263549
Hovs°r R°n	56.59	8.51	2001-03-15	NB	B77	F	A	263550
Hovs°r R°n	56.59	8.51	2001-03-15	NB	B82	F	A	263553
Hovs°r R°n	56.59	8.51	2001-03-15	NB	B85	F	A	263556
Hovs°r R°n	56.59	8.51	2001-03-15	NB	B92	F	A	263559
Hovs°r R°n	56.59	8.51	2001-03-15	NB	C04	F	A	263566
Hovs°r R°n	56.59	8.51	2001-03-15	NB	C07	F	A	263568
Hovs°r R°n	56.59	8.51	2001-03-15	NB	C13	F	A	263571
Hovs°r R°n	56.59	8.51	2001-03-15	NB	C14	F	A	252792
Hovs°r R°n	56.59	8.51	2001-03-15	NB	C20	F	A	263574
Hovs°r R°n	56.59	8.51	2001-03-15	NB	C21	F	A	252544
Hovs°r R°n	56.59	8.51	2001-03-15	NB	C22	F	A	263575
Hovs°r R°n	56.59	8.51	2001-03-15	NB	C23	F	A	263576
Hovs°r R°n	56.59	8.51	2001-03-15	NB	C25	F	A	263578
Hovs°r R°n	56.59	8.51	2001-03-15	NB	C28	F	A	258226
Hovs°r R°n	56.59	8.51	2001-03-15	NB	C29	F	J	263581
Hovs°r R°n	56.59	8.51	2001-03-15	NB	C31	F	J	256716
Hovs°r R°n	56.59	8.51	2001-03-15	NB	C32	F	A	263583
Hovs°r R°n	56.59	8.51	2001-03-15	NB	C33	F	J	263584
Hovs°r R°n	56.59	8.51	2001-03-15	NB	C38	F	A	263588
Hovs°r R°n	56.59	8.51	2001-03-15	NB	C39	F	J	263589
Hovs°r R°n	56.59	8.51	2001-03-15	NB	C44	F	A	263594
Hovs°r R°n	56.59	8.51	2001-03-15	NB	C45	F	A	263595
Hovs°r R°n	56.59	8.51	2001-03-15	NB	C47	F	A	263597
Hovs°r R°n	56.59	8.51	2001-03-15	NB	C49	F	A	263599
Hovs°r R°n	56.59	8.51	2001-03-15	NB	H42	F	A	263601
Hovs°r R°n	56.59	8.51	2001-03-15	NB	H47	F	A	263606
Hovs°r R°n	56.59	8.51	2001-03-15	NB	H48	F	A	263607
Hovs°r R°n	56.59	8.51	2001-03-15	NB	H49	F	A	263608
Hovs°r R°n	56.59	8.51	2001-03-15	NB	H50	F	A	258511
Hovs°r R°n	56.59	8.51	2001-03-15	NB	H53	F	A	263611
Hovs°r R°n	56.59	8.51	2001-03-15	NB	H58	F	A	263616
Hovs°r R°n	56.59	8.51	2001-03-15	NB	H71	F	A	263623
Hovs°r R°n	56.59	8.51	2001-03-15	NB	H72	F	A	263624
Hovs°r R°n	56.59	8.51	2001-03-15	NB	H74	F	A	263626
Hovs°r R°n	56.59	8.51	2001-03-15	NB	H77	F	A	263629
Hovs°r R°n	56.59	8.51	2001-03-15	NB	H82	F	A	263631
Hovs°r R°n	56.59	8.51	2001-03-15	NB	H87	F	A	263635
Hovs°r R°n	56.59	8.51	2001-03-15	NB	H92	F	A	252459
Hovs°r R°n	56.59	8.51	2001-03-15	NB	H95	F	A	263639
Hovs°r R°n	56.59	8.51	2001-03-15	NB	H97	F	A	263640
Hovs°r R°n	56.59	8.51	2001-03-15	NW	K65	F	A	263660
Hovs°r R°n	56.59	8.51	2001-03-15	NB	Z02	F	A	263641
Hovs°r R°n	56.59	8.51	2001-03-15	NB	Z04	F	A	263643
Hovs°r R°n	56.59	8.51	2001-03-15	NB	Z12	F	A	263647
Hovs°r R°n	56.59	8.51	2001-03-15	NB	Z13	F	A	263648
Hovs°r R°n	56.59	8.51	2001-03-15	NB	Z20	F	J	263652
Hovs°r R°n	56.59	8.51	2001-03-15	NB	Z23	F	A	263655
Hovs°r R°n	56.59	8.51	2001-03-15	NB	Z26	F	J	263658
Hovs°r R°n	56.59	8.51	2001-03-15	NB	Z27	F	A	263659
Hovs°r R°n	56.59	8.51	2001-03-15	NB	A47	M	J	263487
Hovs°r R°n	56.59	8.51	2001-03-15	NB	A49	M	J	263489
Hovs°r R°n	56.59	8.51	2001-03-15	NB	A56	M	A	263495
Hovs°r R°n	56.59	8.51	2001-03-15	NB	A57	M	A	263496
Hovs°r R°n	56.59	8.51	2001-03-15	NB	A64	M	A	263500
Hovs°r R°n	56.59	8.51	2001-03-15	NB	A71	M	A	263503
Hovs°r R°n	56.59	8.51	2001-03-15	NB	A74	M	A	263506
Hovs°r R°n	56.59	8.51	2001-03-15	NB	A75	M	A	263507
Hovs°r R°n	56.59	8.51	2001-03-15	NB	A76	M	A	252426
Hovs°r R°n	56.59	8.51	2001-03-15	NB	A79	M	A	263510
Hovs°r R°n	56.59	8.51	2001-03-15	NB	A83	M	A	263512
Hovs°r R°n	56.59	8.51	2001-03-15	NB	A88	M	A	263515
Hovs°r R°n	56.59	8.51	2001-03-15	NB	A92	M	A	263516
Hovs°r R°n	56.59	8.51	2001-03-15	NB	B41	M	A	263521
Hovs°r R°n	56.59	8.51	2001-03-15	NB	B42	M	A	263522
Hovs°r R°n	56.59	8.51	2001-03-15	NB	B43	M	J	263523
Hovs°r R°n	56.59	8.51	2001-03-15	NB	B44	M	A	263524
Hovs°r R°n	56.59	8.51	2001-03-15	NB	B46	M	A	263526
Hovs°r R°n	56.59	8.51	2001-03-15	NB	B48	M	A	263528
Hovs°r R°n	56.59	8.51	2001-03-15	NB	B50	M	A	263530
Hovs°r R°n	56.59	8.51	2001-03-15	NB	B52	M	A	263532
Hovs°r R°n	56.59	8.51	2001-03-15	NB	B54	M	A	263534
Hovs°r R°n	56.59	8.51	2001-03-15	NB	B55	M	A	263535
Hovs°r R°n	56.59	8.51	2001-03-15	NB	B57	M	A	263537
Hovs°r R°n	56.59	8.51	2001-03-15	NB	B59	M	A	263539
Hovs°r R°n	56.59	8.51	2001-03-15	NB	B64	M	A	263541
Hovs°r R°n	56.59	8.51	2001-03-15	NB	B72	M	A	263545
Hovs°r R°n	56.59	8.51	2001-03-15	NB	B73	M	A	263546
Hovs°r R°n	56.59	8.51	2001-03-15	NB	B74	M	J	263547
Hovs°r R°n	56.59	8.51	2001-03-15	NB	B75	M	A	263548
Hovs°r R°n	56.59	8.51	2001-03-15	NB	B78	M	A	263551
Hovs°r R°n	56.59	8.51	2001-03-15	NB	B84	M	A	263555
Hovs°r R°n	56.59	8.51	2001-03-15	NB	B87	M	A	263557
Hovs°r R°n	56.59	8.51	2001-03-15	NB	B95	M	A	263562
Hovs°r R°n	56.59	8.51	2001-03-15	NB	B97	M	A	263563
Hovs°r R°n	56.59	8.51	2001-03-15	NB	C02	M	A	263564
Hovs°r R°n	56.59	8.51	2001-03-15	NB	C11	M	A	263569
Hovs°r R°n	56.59	8.51	2001-03-15	NB	C12	M	A	263570
Hovs°r R°n	56.59	8.51	2001-03-15	NB	C15	M	A	263572
Hovs°r R°n	56.59	8.51	2001-03-15	NB	C27	M	A	263580
Hovs°r R°n	56.59	8.51	2001-03-15	NB	C30	M	A	263582
Hovs°r R°n	56.59	8.51	2001-03-15	NB	C35	M	A	263585
Hovs°r R°n	56.59	8.51	2001-03-15	NB	C36	M	A	263586
Hovs°r R°n	56.59	8.51	2001-03-15	NB	C41	M	J	263591
Hovs°r R°n	56.59	8.51	2001-03-15	NB	C42	M	A	263592
Hovs°r R°n	56.59	8.51	2001-03-15	NB	C43	M	A	263593
Hovs°r R°n	56.59	8.51	2001-03-15	NB	C46	M	A	263596
Hovs°r R°n	56.59	8.51	2001-03-15	NB	H41	M	A	263600
Hovs°r R°n	56.59	8.51	2001-03-15	NB	H43	M	A	263602
Hovs°r R°n	56.59	8.51	2001-03-15	NB	H44	M	A	263603
Hovs°r R°n	56.59	8.51	2001-03-15	NB	H45	M	A	263604
Hovs°r R°n	56.59	8.51	2001-03-15	NB	H52	M	A	263610
Hovs°r R°n	56.59	8.51	2001-03-15	NB	H56	M	A	263614
Hovs°r R°n	56.59	8.51	2001-03-15	NB	H59	M	A	263617
Hovs°r R°n	56.59	8.51	2001-03-15	NB	H62	M	A	263618
Hovs°r R°n	56.59	8.51	2001-03-15	NB	H64	M	A	263619
Hovs°r R°n	56.59	8.51	2001-03-15	NB	H65	M	A	263620
Hovs°r R°n	56.59	8.51	2001-03-15	NB	H70	M	A	263622
Hovs°r R°n	56.59	8.51	2001-03-15	NB	H75	M	A	263627
Hovs°r R°n	56.59	8.51	2001-03-15	NB	H76	M	A	263628
Hovs°r R°n	56.59	8.51	2001-03-15	NB	H78	M	A	252543
Hovs°r R°n	56.59	8.51	2001-03-15	NB	H79	M	J	263630
Hovs°r R°n	56.59	8.51	2001-03-15	NB	H85	M	A	263634
Hovs°r R°n	56.59	8.51	2001-03-15	NB	H94	M	A	263638
Hovs°r R°n	56.59	8.51	2001-03-15	NB	Z03	M	A	263642
Hovs°r R°n	56.59	8.51	2001-03-15	NB	Z05	M	A	263644
Hovs°r R°n	56.59	8.51	2001-03-15	NB	Z14	M	J	263649
Hovs°r R°n	56.59	8.51	2001-03-15	NB	Z15	M	J	263650
Hovs°r R°n	56.59	8.51	2001-03-15	NB	Z21	M	A	263653
Hovs°r R°n	56.59	8.51	2001-03-15	NB	Z22	M	A	263654
Hovs°r R°n	56.59	8.51	2001-03-15	NB	Z25	M	A	263657
Vest Stadil Fjord	56.12	8.08	2002-04-03	NB	E92	F	A	252539
Vest Stadil Fjord	56.12	8.08	2002-04-03	NB	E97	F	A	263673
Vest Stadil Fjord	56.12	8.08	2002-04-03	NB	I12	F	A	263680
Vest Stadil Fjord	56.12	8.08	2002-04-03	NB	I17	F	A	263683
Vest Stadil Fjord	56.12	8.08	2002-04-03	NB	I20	F	A	263684
Vest Stadil Fjord	56.12	8.08	2002-04-03	NB	I25	F	A	263687
Vest Stadil Fjord	56.12	8.08	2002-04-03	NB	I27	F	A	263689
Vest Stadil Fjord	56.12	8.08	2002-04-03	NB	I36	F	A	257273
Vest Stadil Fjord	56.12	8.08	2002-04-03	NB	I45	F	A	263706
Vest Stadil Fjord	56.12	8.08	2002-04-03	NB	I46	F	A	263707
Vest Stadil Fjord	56.12	8.08	2002-04-03	NB	I48	F	A	263709
Vest Stadil Fjord	56.12	8.08	2002-04-03	NB	I57	F	J	263716
Vest Stadil Fjord	56.12	8.08	2002-04-03	NB	I71	F	A	263720
Vest Stadil Fjord	56.12	8.08	2002-04-03	NB	I75	F	J	252511
Vest Stadil Fjord	56.12	8.08	2002-04-03	NB	I77	F	A	263725
Vest Stadil Fjord	56.12	8.08	2002-04-03	NB	I82	F	A	263728
Vest Stadil Fjord	56.12	8.08	2002-04-03	NB	I83	F	A	263729
Vest Stadil Fjord	56.12	8.08	2002-04-03	NB	I84	F	J	263730
Vest Stadil Fjord	56.12	8.08	2002-04-03	NB	I85	F	A	263731
Vest Stadil Fjord	56.12	8.08	2002-04-03	NB	I88	F	A	263734
Vest Stadil Fjord	56.12	8.08	2002-04-03	NB	I95	F	A	258229
Vest Stadil Fjord	56.12	8.08	2002-04-03	NB	I97	F	A	263738
Vest Stadil Fjord	56.12	8.08	2002-04-03	NB	N11	F	A	263739
Vest Stadil Fjord	56.12	8.08	2002-04-03	NB	N13	F	J	263741
Vest Stadil Fjord	56.12	8.08	2002-04-03	NB	N15	F	A	263743
Vest Stadil Fjord	56.12	8.08	2002-04-03	NB	N22	F	J	263747
Vest Stadil Fjord	56.12	8.08	2002-04-03	NB	N24	F	A	263749
Vest Stadil Fjord	56.12	8.08	2002-04-03	NB	N70	F	A	256953
Vest Stadil Fjord	56.12	8.08	2002-04-03	NB	N73	F	J	263753
Vest Stadil Fjord	56.12	8.08	2002-04-03	NB	N84	F	A	252456
Vest Stadil Fjord	56.12	8.08	2002-04-03	NB	N92	F	A	263765
Vest Stadil Fjord	56.12	8.08	2002-04-03	NB	O39	F	J	263771
Vest Stadil Fjord	56.12	8.08	2002-04-03	NB	O62	F	A	263775
Vest Stadil Fjord	56.12	8.08	2002-04-03	NB	R05	F	A	263785
Vest Stadil Fjord	56.12	8.08	2002-04-03	NB	R11	F	A	252882
Vest Stadil Fjord	56.12	8.08	2002-04-03	NB	R12	F	J	263787
Vest Stadil Fjord	56.12	8.08	2002-04-03	NB	R17	F	A	263790
Vest Stadil Fjord	56.12	8.08	2002-04-03	NB	R20	F	A	263791
Vest Stadil Fjord	56.12	8.08	2002-04-03	NB	R26	F	A	263797
Vest Stadil Fjord	56.12	8.08	2002-04-03	NB	R28	F	J	263798
Vest Stadil Fjord	56.12	8.08	2002-04-03	NB	R34	F	A	263804
Vest Stadil Fjord	56.12	8.08	2002-04-03	NB	R35	F	A	263805
Vest Stadil Fjord	56.12	8.08	2002-04-03	NB	R36	F	A	252184
Vest Stadil Fjord	56.12	8.08	2002-04-03	NB	R39	F	J	251635
Vest Stadil Fjord	56.12	8.08	2002-04-03	NB	R44	F	A	263811
Vest Stadil Fjord	56.12	8.08	2002-04-03	NB	R45	F	A	263812
Vest Stadil Fjord	56.12	8.08	2002-04-03	NB	R48	F	A	263815
Vest Stadil Fjord	56.12	8.08	2002-04-03	NB	R49	F	A	252463
Vest Stadil Fjord	56.12	8.08	2002-04-03	NB	R50	F	A	263816
Vest Stadil Fjord	56.12	8.08	2002-04-03	NB	R51	F	A	263817
Vest Stadil Fjord	56.12	8.08	2002-04-03	NB	R57	F	J	263822
Vest Stadil Fjord	56.12	8.08	2002-04-03	NB	R72	F	J	263826
Vest Stadil Fjord	56.12	8.08	2002-04-03	NB	R73	F	A	263827
Vest Stadil Fjord	56.12	8.08	2002-04-03	NB	R78	F	A	263831
Vest Stadil Fjord	56.12	8.08	2002-04-03	NB	R82	F	A	263832
Vest Stadil Fjord	56.12	8.08	2002-04-03	NB	R84	F	J	263834
Vest Stadil Fjord	56.12	8.08	2002-04-03	NB	R87	F	A	263837
Vest Stadil Fjord	56.12	8.08	2002-04-03	NB	R88	F	A	252472
Vest Stadil Fjord	56.12	8.08	2002-04-03	NB	S26	F	A	263842
Vest Stadil Fjord	56.12	8.08	2002-04-03	NB	S46	F	J	263845
Vest Stadil Fjord	56.12	8.08	2002-04-03	NB	S63	F	J	263848
Vest Stadil Fjord	56.12	8.08	2002-04-03	NB	S67	F	A	258225
Vest Stadil Fjord	56.12	8.08	2002-04-03	NB	Z30	F	A	251727
Vest Stadil Fjord	56.12	8.08	2002-04-03	NB	Z36	F	A	263859
Vest Stadil Fjord	56.12	8.08	2002-04-03	NB	Z37	F	A	263860
Vest Stadil Fjord	56.12	8.08	2002-04-03	NB	Z38	F	A	263861
Vest Stadil Fjord	56.12	8.08	2002-04-03	NB	Z39	F	J	263862
Vest Stadil Fjord	56.12	8.08	2002-04-03	NB	Z45	F	A	263868
Vest Stadil Fjord	56.12	8.08	2002-04-03	NB	Z47	F	A	263870
Vest Stadil Fjord	56.12	8.08	2002-04-03	NB	Z62	F	A	263883
Vest Stadil Fjord	56.12	8.08	2002-04-03	NB	Z64	F	A	263884
Vest Stadil Fjord	56.12	8.08	2002-04-03	NB	Z65	F	J	263885
Vest Stadil Fjord	56.12	8.08	2002-04-03	NB	Z70	F	A	263887
Vest Stadil Fjord	56.12	8.08	2002-04-03	NB	Z75	F	A	263892
Vest Stadil Fjord	56.12	8.08	2002-04-03	NB	Z78	F	A	257124
Vest Stadil Fjord	56.12	8.08	2002-04-03	NB	Z84	F	A	263898
Vest Stadil Fjord	56.12	8.08	2002-04-03	NB	Z87	F	A	263900
Vest Stadil Fjord	56.12	8.08	2002-04-03	NB	E76	M	J	252541
Vest Stadil Fjord	56.12	8.08	2002-04-03	NB	E77	M	A	263661
Vest Stadil Fjord	56.12	8.08	2002-04-03	NB	E78	M	A	263662
Vest Stadil Fjord	56.12	8.08	2002-04-03	NB	E79	M	A	263663
Vest Stadil Fjord	56.12	8.08	2002-04-03	NB	E82	M	A	263664
Vest Stadil Fjord	56.12	8.08	2002-04-03	NB	E83	M	J	263665
Vest Stadil Fjord	56.12	8.08	2002-04-03	NB	E85	M	A	263667
Vest Stadil Fjord	56.12	8.08	2002-04-03	NB	E87	M	A	263668
Vest Stadil Fjord	56.12	8.08	2002-04-03	NB	E94	M	A	263671
Vest Stadil Fjord	56.12	8.08	2002-04-03	NB	E95	M	A	263672
Vest Stadil Fjord	56.12	8.08	2002-04-03	NB	I02	M	J	263674
Vest Stadil Fjord	56.12	8.08	2002-04-03	NB	I03	M	A	263675
Vest Stadil Fjord	56.12	8.08	2002-04-03	NB	I05	M	A	263677
Vest Stadil Fjord	56.12	8.08	2002-04-03	NB	I07	M	A	263678
Vest Stadil Fjord	56.12	8.08	2002-04-03	NB	I11	M	A	263679
Vest Stadil Fjord	56.12	8.08	2002-04-03	NB	I13	M	A	263681
Vest Stadil Fjord	56.12	8.08	2002-04-03	NB	I14	M	A	252416
Vest Stadil Fjord	56.12	8.08	2002-04-03	NB	I22	M	A	252480
Vest Stadil Fjord	56.12	8.08	2002-04-03	NB	I23	M	A	252210
Vest Stadil Fjord	56.12	8.08	2002-04-03	NB	I24	M	A	263686
Vest Stadil Fjord	56.12	8.08	2002-04-03	NB	I26	M	A	263688
Vest Stadil Fjord	56.12	8.08	2002-04-03	NB	I28	M	A	263690
Vest Stadil Fjord	56.12	8.08	2002-04-03	NB	I31	M	J	263693
Vest Stadil Fjord	56.12	8.08	2002-04-03	NB	I32	M	A	263694
Vest Stadil Fjord	56.12	8.08	2002-04-03	NB	I33	M	A	263695
Vest Stadil Fjord	56.12	8.08	2002-04-03	NB	I37	M	A	263698
Vest Stadil Fjord	56.12	8.08	2002-04-03	NB	I38	M	A	263699
Vest Stadil Fjord	56.12	8.08	2002-04-03	NB	I39	M	A	263700
Vest Stadil Fjord	56.12	8.08	2002-04-03	NB	I41	M	A	263702
Vest Stadil Fjord	56.12	8.08	2002-04-03	NB	I42	M	J	263703
Vest Stadil Fjord	56.12	8.08	2002-04-03	NB	I43	M	A	263704
Vest Stadil Fjord	56.12	8.08	2002-04-03	NB	I44	M	A	263705
Vest Stadil Fjord	56.12	8.08	2002-04-03	NB	I47	M	A	263708
Vest Stadil Fjord	56.12	8.08	2002-04-03	NB	I49	M	J	252884
Vest Stadil Fjord	56.12	8.08	2002-04-03	NB	I51	M	A	263711
Vest Stadil Fjord	56.12	8.08	2002-04-03	NB	I52	M	A	263712
Vest Stadil Fjord	56.12	8.08	2002-04-03	NB	I55	M	A	263714
Vest Stadil Fjord	56.12	8.08	2002-04-03	NB	I58	M	J	263717
Vest Stadil Fjord	56.12	8.08	2002-04-03	NB	I72	M	A	263721
Vest Stadil Fjord	56.12	8.08	2002-04-03	NB	I73	M	A	263722
Vest Stadil Fjord	56.12	8.08	2002-04-03	NB	I74	M	A	263723
Vest Stadil Fjord	56.12	8.08	2002-04-03	NB	I76	M	A	263724
Vest Stadil Fjord	56.12	8.08	2002-04-03	NB	I79	M	A	263727
Vest Stadil Fjord	56.12	8.08	2002-04-03	NB	I92	M	A	263735
Vest Stadil Fjord	56.12	8.08	2002-04-03	NB	I93	M	A	263736
Vest Stadil Fjord	56.12	8.08	2002-04-03	NB	I94	M	A	263737
Vest Stadil Fjord	56.12	8.08	2002-04-03	NB	N14	M	A	263742
Vest Stadil Fjord	56.12	8.08	2002-04-03	NB	N17	M	A	263744
Vest Stadil Fjord	56.12	8.08	2002-04-03	NB	N21	M	A	263746
Vest Stadil Fjord	56.12	8.08	2002-04-03	NB	N67	M	A	252043
Vest Stadil Fjord	56.12	8.08	2002-04-03	NB	N74	M	A	263754
Vest Stadil Fjord	56.12	8.08	2002-04-03	NB	N75	M	J	263755
Vest Stadil Fjord	56.12	8.08	2002-04-03	NB	N76	M	J	263756
Vest Stadil Fjord	56.12	8.08	2002-04-03	NB	N77	M	A	263757
Vest Stadil Fjord	56.12	8.08	2002-04-03	NB	N78	M	A	263758
Vest Stadil Fjord	56.12	8.08	2002-04-03	NB	N79	M	J	263759
Vest Stadil Fjord	56.12	8.08	2002-04-03	NB	N85	M	A	263762
Vest Stadil Fjord	56.12	8.08	2002-04-03	NB	N88	M	A	263764
Vest Stadil Fjord	56.12	8.08	2002-04-03	NB	N93	M	A	263766
Vest Stadil Fjord	56.12	8.08	2002-04-03	NB	N94	M	A	263767
Vest Stadil Fjord	56.12	8.08	2002-04-03	NB	O29	M	A	263770
Vest Stadil Fjord	56.12	8.08	2002-04-03	NB	O59	M	A	263774
Vest Stadil Fjord	56.12	8.08	2002-04-03	NB	O92	M	A	263780
Vest Stadil Fjord	56.12	8.08	2002-04-03	NB	R07	M	A	263786
Vest Stadil Fjord	56.12	8.08	2002-04-03	NB	R13	M	A	263788
Vest Stadil Fjord	56.12	8.08	2002-04-03	NB	R14	M	A	251899
Vest Stadil Fjord	56.12	8.08	2002-04-03	NB	R15	M	A	263789
Vest Stadil Fjord	56.12	8.08	2002-04-03	NB	R21	M	A	263792
Vest Stadil Fjord	56.12	8.08	2002-04-03	NB	R24	M	A	263795
Vest Stadil Fjord	56.12	8.08	2002-04-03	NB	R27	M	A	252481
Vest Stadil Fjord	56.12	8.08	2002-04-03	NB	R29	M	A	263799
Vest Stadil Fjord	56.12	8.08	2002-04-03	NB	R30	M	A	263800
Vest Stadil Fjord	56.12	8.08	2002-04-03	NB	R31	M	A	263801
Vest Stadil Fjord	56.12	8.08	2002-04-03	NB	R32	M	J	263802
Vest Stadil Fjord	56.12	8.08	2002-04-03	NB	R33	M	A	263803
Vest Stadil Fjord	56.12	8.08	2002-04-03	NB	R38	M	A	263807
Vest Stadil Fjord	56.12	8.08	2002-04-03	NB	R40	M	J	263808
Vest Stadil Fjord	56.12	8.08	2002-04-03	NB	R41	M	A	263809
Vest Stadil Fjord	56.12	8.08	2002-04-03	NB	R42	M	J	263810
Vest Stadil Fjord	56.12	8.08	2002-04-03	NB	R43	M	A	251619
Vest Stadil Fjord	56.12	8.08	2002-04-03	NB	R46	M	J	263813
Vest Stadil Fjord	56.12	8.08	2002-04-03	NB	R47	M	A	263814
Vest Stadil Fjord	56.12	8.08	2002-04-03	NB	R52	M	A	257512
Vest Stadil Fjord	56.12	8.08	2002-04-03	NB	R53	M	A	263818
Vest Stadil Fjord	56.12	8.08	2002-04-03	NB	R55	M	A	263820
Vest Stadil Fjord	56.12	8.08	2002-04-03	NB	R56	M	A	263821
Vest Stadil Fjord	56.12	8.08	2002-04-03	NB	R58	M	A	252540
Vest Stadil Fjord	56.12	8.08	2002-04-03	NB	R59	M	A	263823
Vest Stadil Fjord	56.12	8.08	2002-04-03	NB	R70	M	A	263824
Vest Stadil Fjord	56.12	8.08	2002-04-03	NB	R71	M	A	263825
Vest Stadil Fjord	56.12	8.08	2002-04-03	NB	R75	M	A	263829
Vest Stadil Fjord	56.12	8.08	2002-04-03	NB	R76	M	A	263830
Vest Stadil Fjord	56.12	8.08	2002-04-03	NB	R77	M	A	252267
Vest Stadil Fjord	56.12	8.08	2002-04-03	NB	R79	M	A	252440
Vest Stadil Fjord	56.12	8.08	2002-04-03	NB	R83	M	A	263833
Vest Stadil Fjord	56.12	8.08	2002-04-03	NB	R85	M	A	263835
Vest Stadil Fjord	56.12	8.08	2002-04-03	NB	R92	M	J	263838
Vest Stadil Fjord	56.12	8.08	2002-04-03	NB	R93	M	A	263839
Vest Stadil Fjord	56.12	8.08	2002-04-03	NB	R94	M	A	263840
Vest Stadil Fjord	56.12	8.08	2002-04-03	NB	R95	M	A	263841
Vest Stadil Fjord	56.12	8.08	2002-04-03	NB	S39	M	A	257271
Vest Stadil Fjord	56.12	8.08	2002-04-03	NB	S56	M	A	263846
Vest Stadil Fjord	56.12	8.08	2002-04-03	NB	S59	M	A	263847
Vest Stadil Fjord	56.12	8.08	2002-04-03	NB	S64	M	A	263849
Vest Stadil Fjord	56.12	8.08	2002-04-03	NB	S65	M	A	263850
Vest Stadil Fjord	56.12	8.08	2002-04-03	NB	S79	M	A	263851
Vest Stadil Fjord	56.12	8.08	2002-04-03	NB	Z31	M	J	263854
Vest Stadil Fjord	56.12	8.08	2002-04-03	NB	Z32	M	A	263855
Vest Stadil Fjord	56.12	8.08	2002-04-03	NB	Z35	M	A	263858
Vest Stadil Fjord	56.12	8.08	2002-04-03	NB	Z40	M	A	263863
Vest Stadil Fjord	56.12	8.08	2002-04-03	NB	Z41	M	A	263864
Vest Stadil Fjord	56.12	8.08	2002-04-03	NB	Z44	M	J	263867
Vest Stadil Fjord	56.12	8.08	2002-04-03	NB	Z46	M	A	263869
Vest Stadil Fjord	56.12	8.08	2002-04-03	NB	Z48	M	A	263871
Vest Stadil Fjord	56.12	8.08	2002-04-03	NB	Z49	M	A	263872
Vest Stadil Fjord	56.12	8.08	2002-04-03	NB	Z51	M	A	263874
Vest Stadil Fjord	56.12	8.08	2002-04-03	NB	Z52	M	J	263875
Vest Stadil Fjord	56.12	8.08	2002-04-03	NB	Z54	M	J	263877
Vest Stadil Fjord	56.12	8.08	2002-04-03	NB	Z56	M	A	263879
Vest Stadil Fjord	56.12	8.08	2002-04-03	NB	Z58	M	A	263881
Vest Stadil Fjord	56.12	8.08	2002-04-03	NB	Z71	M	J	263888
Vest Stadil Fjord	56.12	8.08	2002-04-03	NB	Z76	M	A	263893
Vest Stadil Fjord	56.12	8.08	2002-04-03	NB	Z77	M	A	263894
Vest Stadil Fjord	56.12	8.08	2002-04-03	NB	Z82	M	A	263896
Vest Stadil Fjord	56.12	8.08	2002-04-03	NB	Z88	M	J	263901
Vest Stadil Fjord	56.12	8.08	2002-04-03	NB	Z93	M	A	263903
Vest Stadil Fjord	56.12	8.08	2002-04-03	NB	Z97	M	A	263906
Vest Stadil Fjord	56.12	8.08	2003-03-26	NB	A2B	F	J	263908
Vest Stadil Fjord	56.12	8.08	2003-03-26	NB	A2C	F	J	263909
Vest Stadil Fjord	56.12	8.08	2003-03-26	NB	A2H	F	J	263913
Vest Stadil Fjord	56.12	8.08	2003-03-26	NB	A2J	F	J	263914
Vest Stadil Fjord	56.12	8.08	2003-03-26	NB	A2V	F	J	263922
Vest Stadil Fjord	56.12	8.08	2003-03-26	NB	A3N	F	J	263934
Vest Stadil Fjord	56.12	8.08	2003-03-26	NB	A4B	F	A	263943
Vest Stadil Fjord	56.12	8.08	2003-03-26	NB	A4D	F	A	263945
Vest Stadil Fjord	56.12	8.08	2003-03-26	NB	A4F	F	A	263947
Vest Stadil Fjord	56.12	8.08	2003-03-26	NB	A4K	F	J	263951
Vest Stadil Fjord	56.12	8.08	2003-03-26	NB	A4P	F	A	263954
Vest Stadil Fjord	56.12	8.08	2003-03-26	NB	A4S	F	J	263956
Vest Stadil Fjord	56.12	8.08	2003-03-26	NB	A4U	F	A	263958
Vest Stadil Fjord	56.12	8.08	2003-03-26	NB	A5A	F	A	263963
Vest Stadil Fjord	56.12	8.08	2003-03-26	NB	A5F	F	A	263968
Vest Stadil Fjord	56.12	8.08	2003-03-26	NB	A5G	F	A	263969
Vest Stadil Fjord	56.12	8.08	2003-03-26	NB	A5K	F	J	263972
Vest Stadil Fjord	56.12	8.08	2003-03-26	NB	A5M	F	A	263974
Vest Stadil Fjord	56.12	8.08	2003-03-26	NB	A5N	F	A	263975
Vest Stadil Fjord	56.12	8.08	2003-03-26	NB	A5P	F	A	263976
Vest Stadil Fjord	56.12	8.08	2003-03-26	NB	A5U	F	A	263980
Vest Stadil Fjord	56.12	8.08	2003-03-26	NB	A5Y	F	A	263983
Vest Stadil Fjord	56.12	8.08	2003-03-26	NB	A6C	F	A	263986
Vest Stadil Fjord	56.12	8.08	2003-03-26	NB	A6E	F	A	263988
Vest Stadil Fjord	56.12	8.08	2003-03-26	NB	A6H	F	A	263991
Vest Stadil Fjord	56.12	8.08	2003-03-26	NB	A6M	F	A	252473
Vest Stadil Fjord	56.12	8.08	2003-03-26	NB	A6N	F	A	263995
Vest Stadil Fjord	56.12	8.08	2003-03-26	NB	A6U	F	A	252206
Vest Stadil Fjord	56.12	8.08	2003-03-26	NB	A6Y	F	A	264002
Vest Stadil Fjord	56.12	8.08	2003-03-26	NB	A7B	F	A	264005
Vest Stadil Fjord	56.12	8.08	2003-03-26	NB	A7D	F	A	252883
Vest Stadil Fjord	56.12	8.08	2003-03-26	NB	A7G	F	A	264009
Vest Stadil Fjord	56.12	8.08	2003-03-26	NB	A7H	F	A	257274
Vest Stadil Fjord	56.12	8.08	2003-03-26	NB	A7L	F	A	264012
Vest Stadil Fjord	56.12	8.08	2003-03-26	NB	A7P	F	A	264015
Vest Stadil Fjord	56.12	8.08	2003-03-26	NB	A7R	F	A	264016
Vest Stadil Fjord	56.12	8.08	2003-03-26	NB	A7S	F	A	264017
Vest Stadil Fjord	56.12	8.08	2003-03-26	NB	A7T	F	A	264018
Vest Stadil Fjord	56.12	8.08	2003-03-26	NB	A7V	F	A	264020
Vest Stadil Fjord	56.12	8.08	2003-03-26	NB	A8C	F	A	264026
Vest Stadil Fjord	56.12	8.08	2003-03-26	NB	A8G	F	A	264030
Vest Stadil Fjord	56.12	8.08	2003-03-26	NB	A8R	F	A	264037
Vest Stadil Fjord	56.12	8.08	2003-03-26	NB	A8T	F	A	264039
Vest Stadil Fjord	56.12	8.08	2003-03-26	NB	A8U	F	A	264040
Vest Stadil Fjord	56.12	8.08	2003-03-26	NB	A8V	F	A	257272
Vest Stadil Fjord	56.12	8.08	2003-03-26	NB	B2C	F	A	264044
Vest Stadil Fjord	56.12	8.08	2003-03-26	NB	B2D	F	A	264045
Vest Stadil Fjord	56.12	8.08	2003-03-26	NB	B2E	F	A	264046
Vest Stadil Fjord	56.12	8.08	2003-03-26	NB	B2G	F	A	264047
Vest Stadil Fjord	56.12	8.08	2003-03-26	NB	B2H	F	A	264048
Vest Stadil Fjord	56.12	8.08	2003-03-26	NB	B2J	F	A	264049
Vest Stadil Fjord	56.12	8.08	2003-03-26	NB	B2K	F	A	264050
Vest Stadil Fjord	56.12	8.08	2003-03-26	NB	B2L	F	A	264051
Vest Stadil Fjord	56.12	8.08	2003-03-26	NB	B2P	F	A	252593
Vest Stadil Fjord	56.12	8.08	2003-03-26	NB	B2R	F	A	264054
Vest Stadil Fjord	56.12	8.08	2003-03-26	NB	B2U	F	A	264057
Vest Stadil Fjord	56.12	8.08	2003-03-26	NB	B2V	F	A	264058
Vest Stadil Fjord	56.12	8.08	2003-03-26	NB	B3E	F	A	264066
Vest Stadil Fjord	56.12	8.08	2003-03-26	NB	B3H	F	A	264068
Vest Stadil Fjord	56.12	8.08	2003-03-26	NB	B3J	F	A	264069
Vest Stadil Fjord	56.12	8.08	2003-03-26	NB	B3K	F	A	264070
Vest Stadil Fjord	56.12	8.08	2003-03-26	NB	B3L	F	A	264071
Vest Stadil Fjord	56.12	8.08	2003-03-26	NB	B3N	F	J	264072
Vest Stadil Fjord	56.12	8.08	2003-03-26	NB	B3P	F	A	264073
Vest Stadil Fjord	56.12	8.08	2003-03-26	NB	B3T	F	A	264076
Vest Stadil Fjord	56.12	8.08	2003-03-26	NB	B3V	F	A	264077
Vest Stadil Fjord	56.12	8.08	2003-03-26	NB	B3Z	F	A	264078
Vest Stadil Fjord	56.12	8.08	2003-03-26	NB	B4B	F	A	264080
Vest Stadil Fjord	56.12	8.08	2003-03-26	NB	B4E	F	A	264083
Vest Stadil Fjord	56.12	8.08	2003-03-26	NB	B4F	F	A	264084
Vest Stadil Fjord	56.12	8.08	2003-03-26	NB	B4H	F	A	264086
Vest Stadil Fjord	56.12	8.08	2003-03-26	NB	B4J	F	A	264087
Vest Stadil Fjord	56.12	8.08	2003-03-26	NB	B4L	F	A	264089
Vest Stadil Fjord	56.12	8.08	2003-03-26	NB	B4M	F	A	264090
Vest Stadil Fjord	56.12	8.08	2003-03-26	NB	B4N	F	A	264091
Vest Stadil Fjord	56.12	8.08	2003-03-26	NB	A2A	M	J	263907
Vest Stadil Fjord	56.12	8.08	2003-03-26	NB	A2D	M	J	251706
Vest Stadil Fjord	56.12	8.08	2003-03-26	NB	A2E	M	A	263910
Vest Stadil Fjord	56.12	8.08	2003-03-26	NB	A2F	M	A	263911
Vest Stadil Fjord	56.12	8.08	2003-03-26	NB	A2G	M	A	263912
Vest Stadil Fjord	56.12	8.08	2003-03-26	NB	A2K	M	A	263915
Vest Stadil Fjord	56.12	8.08	2003-03-26	NB	A2L	M	A	263916
Vest Stadil Fjord	56.12	8.08	2003-03-26	NB	A2M	M	A	263917
Vest Stadil Fjord	56.12	8.08	2003-03-26	NB	A2S	M	A	263920
Vest Stadil Fjord	56.12	8.08	2003-03-26	NB	A2U	M	A	263921
Vest Stadil Fjord	56.12	8.08	2003-03-26	NB	A2X	M	A	263923
Vest Stadil Fjord	56.12	8.08	2003-03-26	NB	A2Y	M	A	263924
Vest Stadil Fjord	56.12	8.08	2003-03-26	NB	A2Z	M	A	256715
Vest Stadil Fjord	56.12	8.08	2003-03-26	NB	A3A	M	A	263925
Vest Stadil Fjord	56.12	8.08	2003-03-26	NB	A3B	M	A	263926
Vest Stadil Fjord	56.12	8.08	2003-03-26	NB	A3C	M	A	263927
Vest Stadil Fjord	56.12	8.08	2003-03-26	NB	A3D	M	A	263928
Vest Stadil Fjord	56.12	8.08	2003-03-26	NB	A3E	M	A	263929
Vest Stadil Fjord	56.12	8.08	2003-03-26	NB	A3F	M	A	263930
Vest Stadil Fjord	56.12	8.08	2003-03-26	NB	A3G	M	A	263931
Vest Stadil Fjord	56.12	8.08	2003-03-26	NB	A3H	M	A	251894
Vest Stadil Fjord	56.12	8.08	2003-03-26	NB	A3J	M	A	263932
Vest Stadil Fjord	56.12	8.08	2003-03-26	NB	A3M	M	J	252487
Vest Stadil Fjord	56.12	8.08	2003-03-26	NB	A3S	M	A	263936
Vest Stadil Fjord	56.12	8.08	2003-03-26	NB	A3T	M	A	263937
Vest Stadil Fjord	56.12	8.08	2003-03-26	NB	A3U	M	A	263938
Vest Stadil Fjord	56.12	8.08	2003-03-26	NB	A3V	M	A	263939
Vest Stadil Fjord	56.12	8.08	2003-03-26	NB	A3X	M	A	263940
Vest Stadil Fjord	56.12	8.08	2003-03-26	NB	A3Y	M	A	263941
Vest Stadil Fjord	56.12	8.08	2003-03-26	NB	A4A	M	A	263942
Vest Stadil Fjord	56.12	8.08	2003-03-26	NB	A4C	M	A	263944
Vest Stadil Fjord	56.12	8.08	2003-03-26	NB	A4J	M	A	263950
Vest Stadil Fjord	56.12	8.08	2003-03-26	NB	A4N	M	A	263953
Vest Stadil Fjord	56.12	8.08	2003-03-26	NB	A4X	M	A	263960
Vest Stadil Fjord	56.12	8.08	2003-03-26	NB	A4Y	M	J	263961
Vest Stadil Fjord	56.12	8.08	2003-03-26	NB	A4Z	M	A	263962
Vest Stadil Fjord	56.12	8.08	2003-03-26	NB	A5B	M	J	263964
Vest Stadil Fjord	56.12	8.08	2003-03-26	NB	A5C	M	A	263965
Vest Stadil Fjord	56.12	8.08	2003-03-26	NB	A5D	M	A	263966
Vest Stadil Fjord	56.12	8.08	2003-03-26	NB	A5H	M	A	263970
Vest Stadil Fjord	56.12	8.08	2003-03-26	NB	A5L	M	A	263973
Vest Stadil Fjord	56.12	8.08	2003-03-26	NB	A5R	M	J	263977
Vest Stadil Fjord	56.12	8.08	2003-03-26	NB	A5S	M	A	263978
Vest Stadil Fjord	56.12	8.08	2003-03-26	NB	A5V	M	A	263981
Vest Stadil Fjord	56.12	8.08	2003-03-26	NB	A5Z	M	J	263984
Vest Stadil Fjord	56.12	8.08	2003-03-26	NB	A6A	M	A	263985
Vest Stadil Fjord	56.12	8.08	2003-03-26	NB	A6B	M	A	251622
Vest Stadil Fjord	56.12	8.08	2003-03-26	NB	A6D	M	A	263987
Vest Stadil Fjord	56.12	8.08	2003-03-26	NB	A6F	M	J	263989
Vest Stadil Fjord	56.12	8.08	2003-03-26	NB	A6J	M	A	263992
Vest Stadil Fjord	56.12	8.08	2003-03-26	NB	A6L	M	A	263994
Vest Stadil Fjord	56.12	8.08	2003-03-26	NB	A6P	M	A	263996
Vest Stadil Fjord	56.12	8.08	2003-03-26	NB	A6R	M	A	263997
Vest Stadil Fjord	56.12	8.08	2003-03-26	NB	A6S	M	A	263998
Vest Stadil Fjord	56.12	8.08	2003-03-26	NB	A6T	M	J	263999
Vest Stadil Fjord	56.12	8.08	2003-03-26	NB	A6X	M	A	264001
Vest Stadil Fjord	56.12	8.08	2003-03-26	NB	A7E	M	A	264007
Vest Stadil Fjord	56.12	8.08	2003-03-26	NB	A7F	M	A	264008
Vest Stadil Fjord	56.12	8.08	2003-03-26	NB	A7K	M	A	264011
Vest Stadil Fjord	56.12	8.08	2003-03-26	NB	A7M	M	A	264013
Vest Stadil Fjord	56.12	8.08	2003-03-26	NB	A7N	M	A	264014
Vest Stadil Fjord	56.12	8.08	2003-03-26	NB	A7X	M	A	264021
Vest Stadil Fjord	56.12	8.08	2003-03-26	NB	A7Z	M	A	264023
Vest Stadil Fjord	56.12	8.08	2003-03-26	NB	A8A	M	J	264024
Vest Stadil Fjord	56.12	8.08	2003-03-26	NB	A8B	M	A	264025
Vest Stadil Fjord	56.12	8.08	2003-03-26	NB	A8E	M	A	264028
Vest Stadil Fjord	56.12	8.08	2003-03-26	NB	A8K	M	A	264033
Vest Stadil Fjord	56.12	8.08	2003-03-26	NB	A8N	M	A	264035
Vest Stadil Fjord	56.12	8.08	2003-03-26	NB	A8P	M	A	264036
Vest Stadil Fjord	56.12	8.08	2003-03-26	NB	A8X	M	A	264041
Vest Stadil Fjord	56.12	8.08	2003-03-26	NB	A8Y	M	A	264042
Vest Stadil Fjord	56.12	8.08	2003-03-26	NB	B2F	M	A	252438
Vest Stadil Fjord	56.12	8.08	2003-03-26	NB	B2M	M	A	264052
Vest Stadil Fjord	56.12	8.08	2003-03-26	NB	B2S	M	A	264055
Vest Stadil Fjord	56.12	8.08	2003-03-26	NB	B2T	M	A	264056
Vest Stadil Fjord	56.12	8.08	2003-03-26	NB	B2Y	M	J	264060
Vest Stadil Fjord	56.12	8.08	2003-03-26	NB	B2Z	M	A	264061
Vest Stadil Fjord	56.12	8.08	2003-03-26	NB	B3A	M	A	264062
Vest Stadil Fjord	56.12	8.08	2003-03-26	NB	B3B	M	J	264063
Vest Stadil Fjord	56.12	8.08	2003-03-26	NB	B3C	M	A	264064
Vest Stadil Fjord	56.12	8.08	2003-03-26	NB	B3F	M	A	264067
Vest Stadil Fjord	56.12	8.08	2003-03-26	NB	B3R	M	A	264074
Vest Stadil Fjord	56.12	8.08	2003-03-26	NB	B3U	M	A	257511
Vest Stadil Fjord	56.12	8.08	2003-03-26	NB	B4C	M	A	264081
Vest Stadil Fjord	56.12	8.08	2003-03-26	NB	B4D	M	A	264082
Vest Stadil Fjord	56.12	8.08	2003-03-26	NB	B4K	M	A	264088
Vest Stadil Fjord	56.12	8.08	2003-03-26	NB	B4P	M	A	264092
Vest Stadil Fjord	56.12	8.08	2003-03-26	NB	B4S	M	A	264094
Vest Stadil Fjord	56.12	8.08	2004-03-31	NB	B1A	F	A	264096
Vest Stadil Fjord	56.12	8.08	2004-03-31	NB	B1G	F	A	264102
Vest Stadil Fjord	56.12	8.08	2004-03-31	NB	B1H	F	A	252430
Vest Stadil Fjord	56.12	8.08	2004-03-31	NB	B1K	F	A	258512
Vest Stadil Fjord	56.12	8.08	2004-03-31	NB	B1P	F	A	264107
Vest Stadil Fjord	56.12	8.08	2004-03-31	NB	B1T	F	A	264110
Vest Stadil Fjord	56.12	8.08	2004-03-31	NB	B1Y	F	J	264114
Vest Stadil Fjord	56.12	8.08	2004-03-31	NB	B4Y	F	A	264119
Vest Stadil Fjord	56.12	8.08	2004-03-31	NB	B4Z	F	A	264120
Vest Stadil Fjord	56.12	8.08	2004-03-31	NB	B5A	F	A	264121
Vest Stadil Fjord	56.12	8.08	2004-03-31	NB	B5B	F	A	264122
Vest Stadil Fjord	56.12	8.08	2004-03-31	NB	B5M	F	A	257209
Vest Stadil Fjord	56.12	8.08	2004-03-31	NB	B5N	F	J	264132
Vest Stadil Fjord	56.12	8.08	2004-03-31	NB	B5T	F	A	264135
Vest Stadil Fjord	56.12	8.08	2004-03-31	NB	B5V	F	A	264137
Vest Stadil Fjord	56.12	8.08	2004-03-31	NB	B6C	F	J	264142
Vest Stadil Fjord	56.12	8.08	2004-03-31	NB	B6F	F	J	251634
Vest Stadil Fjord	56.12	8.08	2004-03-31	NB	B6J	F	A	264147
Vest Stadil Fjord	56.12	8.08	2004-03-31	NB	B6P	F	J	264152
Vest Stadil Fjord	56.12	8.08	2004-03-31	NB	B6U	F	A	264156
Vest Stadil Fjord	56.12	8.08	2004-03-31	NB	B7A	F	A	252389
Vest Stadil Fjord	56.12	8.08	2004-03-31	NB	B7B	F	A	264161
Vest Stadil Fjord	56.12	8.08	2004-03-31	NB	B7C	F	J	264162
Vest Stadil Fjord	56.12	8.08	2004-03-31	NB	B7E	F	A	264164
Vest Stadil Fjord	56.12	8.08	2004-03-31	NB	B7L	F	J	252885
Vest Stadil Fjord	56.12	8.08	2004-03-31	NB	B7M	F	J	252443
Vest Stadil Fjord	56.12	8.08	2004-03-31	NB	B7N	F	J	264169
Vest Stadil Fjord	56.12	8.08	2004-03-31	NB	B7P	F	A	264170
Vest Stadil Fjord	56.12	8.08	2004-03-31	NB	B7X	F	A	264176
Vest Stadil Fjord	56.12	8.08	2004-03-31	NB	B7Z	F	A	264178
Vest Stadil Fjord	56.12	8.08	2004-03-31	NB	B8E	F	A	264182
Vest Stadil Fjord	56.12	8.08	2004-03-31	NB	B8G	F	A	264183
Vest Stadil Fjord	56.12	8.08	2004-03-31	NB	B8N	F	A	264189
Vest Stadil Fjord	56.12	8.08	2004-03-31	NB	B8P	F	A	264190
Vest Stadil Fjord	56.12	8.08	2004-03-31	NB	B8R	F	A	264191
Vest Stadil Fjord	56.12	8.08	2004-03-31	NB	B8S	F	A	264192
Vest Stadil Fjord	56.12	8.08	2004-03-31	NB	B8U	F	A	264194
Vest Stadil Fjord	56.12	8.08	2004-03-31	NB	B8V	F	A	264195
Vest Stadil Fjord	56.12	8.08	2004-03-31	NB	B8Y	F	A	264196
Vest Stadil Fjord	56.12	8.08	2004-03-31	NB	C1B	F	A	264199
Vest Stadil Fjord	56.12	8.08	2004-03-31	NB	C1K	F	A	264205
Vest Stadil Fjord	56.12	8.08	2004-03-31	NB	C1L	F	A	264206
Vest Stadil Fjord	56.12	8.08	2004-03-31	NB	C1M	F	A	264207
Vest Stadil Fjord	56.12	8.08	2004-03-31	NB	C1P	F	A	264209
Vest Stadil Fjord	56.12	8.08	2004-03-31	NB	C1U	F	J	252888
Vest Stadil Fjord	56.12	8.08	2004-03-31	NB	C1V	F	A	264213
Vest Stadil Fjord	56.12	8.08	2004-03-31	NB	C1Y	F	J	258224
Vest Stadil Fjord	56.12	8.08	2004-03-31	NB	C2A	F	J	264216
Vest Stadil Fjord	56.12	8.08	2004-03-31	NB	C2C	F	A	258223
Vest Stadil Fjord	56.12	8.08	2004-03-31	NB	C2E	F	A	264219
Vest Stadil Fjord	56.12	8.08	2004-03-31	NB	C2L	F	A	258230
Vest Stadil Fjord	56.12	8.08	2004-03-31	NB	C2T	F	J	264230
Vest Stadil Fjord	56.12	8.08	2004-03-31	NB	C2V	F	A	264232
Vest Stadil Fjord	56.12	8.08	2004-03-31	NB	C2X	F	J	252439
Vest Stadil Fjord	56.12	8.08	2004-03-31	NB	C2Z	F	A	264234
Vest Stadil Fjord	56.12	8.08	2004-03-31	NB	C3A	F	A	264235
Vest Stadil Fjord	56.12	8.08	2004-03-31	NB	C3B	F	A	264236
Vest Stadil Fjord	56.12	8.08	2004-03-31	NB	C3C	F	A	264237
Vest Stadil Fjord	56.12	8.08	2004-03-31	NB	C3F	F	A	264240
Vest Stadil Fjord	56.12	8.08	2004-03-31	NB	C3H	F	A	252190
Vest Stadil Fjord	56.12	8.08	2004-03-31	NB	C3V	F	A	264252
Vest Stadil Fjord	56.12	8.08	2004-03-31	NB	C3Y	F	A	264254
Vest Stadil Fjord	56.12	8.08	2004-03-31	NB	C4A	F	A	264255
Vest Stadil Fjord	56.12	8.08	2004-03-31	NB	C4C	F	J	264257
Vest Stadil Fjord	56.12	8.08	2004-03-31	NB	C4F	F	J	264259
Vest Stadil Fjord	56.12	8.08	2004-03-31	NB	C4K	F	J	258222
Vest Stadil Fjord	56.12	8.08	2004-03-31	NB	C4N	F	A	264265
Vest Stadil Fjord	56.12	8.08	2004-03-31	NB	C5A	F	J	264275
Vest Stadil Fjord	56.12	8.08	2004-03-31	NB	C5E	F	A	252894
Vest Stadil Fjord	56.12	8.08	2004-03-31	NB	C5F	F	A	264279
Vest Stadil Fjord	56.12	8.08	2004-03-31	NB	C5H	F	A	264280
Vest Stadil Fjord	56.12	8.08	2004-03-31	NB	C5L	F	A	264283
Vest Stadil Fjord	56.12	8.08	2004-03-31	NB	C5N	F	A	264285
Vest Stadil Fjord	56.12	8.08	2004-03-31	NB	C5P	F	J	264286
Vest Stadil Fjord	56.12	8.08	2004-03-31	NB	C5R	F	J	264287
Vest Stadil Fjord	56.12	8.08	2004-03-31	NB	C5T	F	A	264289
Vest Stadil Fjord	56.12	8.08	2004-03-31	NB	C5V	F	J	264291
Vest Stadil Fjord	56.12	8.08	2004-03-31	NB	C5X	F	J	264292
Vest Stadil Fjord	56.12	8.08	2004-03-31	NB	C5Z	F	A	264293
Vest Stadil Fjord	56.12	8.08	2004-03-31	NB	C6B	F	A	264295
Vest Stadil Fjord	56.12	8.08	2004-03-31	NB	C6E	F	A	264298
Vest Stadil Fjord	56.12	8.08	2004-03-31	NB	C6H	F	J	264301
Vest Stadil Fjord	56.12	8.08	2004-03-31	NB	C6L	F	A	264302
Vest Stadil Fjord	56.12	8.08	2004-03-31	NB	C6N	F	A	264304
Vest Stadil Fjord	56.12	8.08	2004-03-31	NB	C6U	F	A	264309
Vest Stadil Fjord	56.12	8.08	2004-03-31	NB	C6V	F	A	264310
Vest Stadil Fjord	56.12	8.08	2004-03-31	NB	C6X	F	A	264311
Vest Stadil Fjord	56.12	8.08	2004-03-31	NB	C6Y	F	J	264312
Vest Stadil Fjord	56.12	8.08	2004-03-31	NB	C7A	F	A	264314
Vest Stadil Fjord	56.12	8.08	2004-03-31	NB	C7F	F	A	264319
Vest Stadil Fjord	56.12	8.08	2004-03-31	NB	C7H	F	A	264321
Vest Stadil Fjord	56.12	8.08	2004-03-31	NB	C7J	F	A	264322
Vest Stadil Fjord	56.12	8.08	2004-03-31	NB	C7L	F	A	264324
Vest Stadil Fjord	56.12	8.08	2004-03-31	NB	C7P	F	J	264327
Vest Stadil Fjord	56.12	8.08	2004-03-31	NB	C7S	F	J	264329
Vest Stadil Fjord	56.12	8.08	2004-03-31	NB	C7V	F	A	252435
Vest Stadil Fjord	56.12	8.08	2004-03-31	NB	C7Z	F	A	264334
Vest Stadil Fjord	56.12	8.08	2004-03-31	NB	C8D	F	A	264337
Vest Stadil Fjord	56.12	8.08	2004-03-31	NB	C8E	F	A	264338
Vest Stadil Fjord	56.12	8.08	2004-03-31	NB	C8F	F	A	257515
Vest Stadil Fjord	56.12	8.08	2004-03-31	NB	C8G	F	A	264339
Vest Stadil Fjord	56.12	8.08	2004-03-31	NB	C8H	F	A	264340
Vest Stadil Fjord	56.12	8.08	2004-03-31	NB	C8P	F	J	264346
Vest Stadil Fjord	56.12	8.08	2004-03-31	NB	C8R	F	A	264347
Vest Stadil Fjord	56.12	8.08	2004-03-31	NB	C8V	F	A	264351
Vest Stadil Fjord	56.12	8.08	2004-03-31	NB	C8Y	F	A	264353
Vest Stadil Fjord	56.12	8.08	2004-03-31	NB	B1B	M	A	264097
Vest Stadil Fjord	56.12	8.08	2004-03-31	NB	B1C	M	A	264098
Vest Stadil Fjord	56.12	8.08	2004-03-31	NB	B1E	M	A	264100
Vest Stadil Fjord	56.12	8.08	2004-03-31	NB	B1F	M	A	264101
Vest Stadil Fjord	56.12	8.08	2004-03-31	NB	B1M	M	A	264105
Vest Stadil Fjord	56.12	8.08	2004-03-31	NB	B1N	M	A	264106
Vest Stadil Fjord	56.12	8.08	2004-03-31	NB	B1R	M	A	264108
Vest Stadil Fjord	56.12	8.08	2004-03-31	NB	B1U	M	J	264111
Vest Stadil Fjord	56.12	8.08	2004-03-31	NB	B1Z	M	A	264115
Vest Stadil Fjord	56.12	8.08	2004-03-31	NB	B4U	M	A	264116
Vest Stadil Fjord	56.12	8.08	2004-03-31	NB	B4V	M	A	264117
Vest Stadil Fjord	56.12	8.08	2004-03-31	NB	B4X	M	A	264118
Vest Stadil Fjord	56.12	8.08	2004-03-31	NB	B5C	M	A	264123
Vest Stadil Fjord	56.12	8.08	2004-03-31	NB	B5D	M	A	264124
Vest Stadil Fjord	56.12	8.08	2004-03-31	NB	B5E	M	J	264125
Vest Stadil Fjord	56.12	8.08	2004-03-31	NB	B5K	M	A	264130
Vest Stadil Fjord	56.12	8.08	2004-03-31	NB	B5L	M	A	264131
Vest Stadil Fjord	56.12	8.08	2004-03-31	NB	B5P	M	A	257514
Vest Stadil Fjord	56.12	8.08	2004-03-31	NB	B5R	M	A	264133
Vest Stadil Fjord	56.12	8.08	2004-03-31	NB	B5S	M	A	264134
Vest Stadil Fjord	56.12	8.08	2004-03-31	NB	B5X	M	J	264138
Vest Stadil Fjord	56.12	8.08	2004-03-31	NB	B5Z	M	A	264140
Vest Stadil Fjord	56.12	8.08	2004-03-31	NB	B6E	M	A	264144
Vest Stadil Fjord	56.12	8.08	2004-03-31	NB	B6H	M	A	264146
Vest Stadil Fjord	56.12	8.08	2004-03-31	NB	B6K	M	A	264148
Vest Stadil Fjord	56.12	8.08	2004-03-31	NB	B6N	M	J	264151
Vest Stadil Fjord	56.12	8.08	2004-03-31	NB	B6R	M	J	264153
Vest Stadil Fjord	56.12	8.08	2004-03-31	NB	B6S	M	A	264154
Vest Stadil Fjord	56.12	8.08	2004-03-31	NB	B6Z	M	J	264160
Vest Stadil Fjord	56.12	8.08	2004-03-31	NB	B7H	M	A	264167
Vest Stadil Fjord	56.12	8.08	2004-03-31	NB	B7J	M	J	252477
Vest Stadil Fjord	56.12	8.08	2004-03-31	NB	B7K	M	A	264168
Vest Stadil Fjord	56.12	8.08	2004-03-31	NB	B7S	M	J	264172
Vest Stadil Fjord	56.12	8.08	2004-03-31	NB	B7V	M	A	264175
Vest Stadil Fjord	56.12	8.08	2004-03-31	NB	B8D	M	A	264181
Vest Stadil Fjord	56.12	8.08	2004-03-31	NB	B8F	M	A	252545
Vest Stadil Fjord	56.12	8.08	2004-03-31	NB	B8L	M	A	264187
Vest Stadil Fjord	56.12	8.08	2004-03-31	NB	B8M	M	A	264188
Vest Stadil Fjord	56.12	8.08	2004-03-31	NB	B8T	M	A	264193
Vest Stadil Fjord	56.12	8.08	2004-03-31	NB	B8Z	M	A	264197
Vest Stadil Fjord	56.12	8.08	2004-03-31	NB	C1A	M	A	264198
Vest Stadil Fjord	56.12	8.08	2004-03-31	NB	C1C	M	A	252455
Vest Stadil Fjord	56.12	8.08	2004-03-31	NB	C1D	M	A	264200
Vest Stadil Fjord	56.12	8.08	2004-03-31	NB	C1F	M	A	264202
Vest Stadil Fjord	56.12	8.08	2004-03-31	NB	C1R	M	J	264210
Vest Stadil Fjord	56.12	8.08	2004-03-31	NB	C1S	M	A	264211
Vest Stadil Fjord	56.12	8.08	2004-03-31	NB	C1T	M	A	264212
Vest Stadil Fjord	56.12	8.08	2004-03-31	NB	C1X	M	A	264214
Vest Stadil Fjord	56.12	8.08	2004-03-31	NB	C2B	M	A	264217
Vest Stadil Fjord	56.12	8.08	2004-03-31	NB	C2G	M	A	264221
Vest Stadil Fjord	56.12	8.08	2004-03-31	NB	C2M	M	J	264225
Vest Stadil Fjord	56.12	8.08	2004-03-31	NB	C2N	M	A	264226
Vest Stadil Fjord	56.12	8.08	2004-03-31	NB	C2P	M	A	264227
Vest Stadil Fjord	56.12	8.08	2004-03-31	NB	C2R	M	A	264228
Vest Stadil Fjord	56.12	8.08	2004-03-31	NB	C2U	M	A	264231
Vest Stadil Fjord	56.12	8.08	2004-03-31	NB	C2Y	M	A	264233
Vest Stadil Fjord	56.12	8.08	2004-03-31	NB	C3E	M	J	264239
Vest Stadil Fjord	56.12	8.08	2004-03-31	NB	C3G	M	A	264241
Vest Stadil Fjord	56.12	8.08	2004-03-31	NB	C3J	M	A	264242
Vest Stadil Fjord	56.12	8.08	2004-03-31	NB	C3K	M	A	264243
Vest Stadil Fjord	56.12	8.08	2004-03-31	NB	C3L	M	A	264244
Vest Stadil Fjord	56.12	8.08	2004-03-31	NB	C3M	M	A	264245
Vest Stadil Fjord	56.12	8.08	2004-03-31	NB	C3N	M	A	264246
Vest Stadil Fjord	56.12	8.08	2004-03-31	NB	C3R	M	A	264248
Vest Stadil Fjord	56.12	8.08	2004-03-31	NB	C3S	M	A	264249
Vest Stadil Fjord	56.12	8.08	2004-03-31	NB	C3X	M	J	264253
Vest Stadil Fjord	56.12	8.08	2004-03-31	NB	C3Z	M	A	258227
Vest Stadil Fjord	56.12	8.08	2004-03-31	NB	C4B	M	A	264256
Vest Stadil Fjord	56.12	8.08	2004-03-31	NB	C4E	M	A	258467
Vest Stadil Fjord	56.12	8.08	2004-03-31	NB	C4G	M	A	264260
Vest Stadil Fjord	56.12	8.08	2004-03-31	NB	C4J	M	A	264262
Vest Stadil Fjord	56.12	8.08	2004-03-31	NB	C4L	M	A	264263
Vest Stadil Fjord	56.12	8.08	2004-03-31	NB	C4M	M	A	264264
Vest Stadil Fjord	56.12	8.08	2004-03-31	NB	C4P	M	A	264266
Vest Stadil Fjord	56.12	8.08	2004-03-31	NB	C4U	M	A	264270
Vest Stadil Fjord	56.12	8.08	2004-03-31	NB	C4V	M	A	264271
Vest Stadil Fjord	56.12	8.08	2004-03-31	NB	C4Y	M	J	264273
Vest Stadil Fjord	56.12	8.08	2004-03-31	NB	C4Z	M	J	264274
Vest Stadil Fjord	56.12	8.08	2004-03-31	NB	C5B	M	J	264276
Vest Stadil Fjord	56.12	8.08	2004-03-31	NB	C5D	M	J	264278
Vest Stadil Fjord	56.12	8.08	2004-03-31	NB	C5G	M	J	251630
Vest Stadil Fjord	56.12	8.08	2004-03-31	NB	C5J	M	A	264281
Vest Stadil Fjord	56.12	8.08	2004-03-31	NB	C5K	M	A	264282
Vest Stadil Fjord	56.12	8.08	2004-03-31	NB	C5S	M	J	264288
Vest Stadil Fjord	56.12	8.08	2004-03-31	NB	C5U	M	J	264290
Vest Stadil Fjord	56.12	8.08	2004-03-31	NB	C6A	M	A	264294
Vest Stadil Fjord	56.12	8.08	2004-03-31	NB	C6D	M	A	264297
Vest Stadil Fjord	56.12	8.08	2004-03-31	NB	C6G	M	A	264300
Vest Stadil Fjord	56.12	8.08	2004-03-31	NB	C6J	M	A	251838
Vest Stadil Fjord	56.12	8.08	2004-03-31	NB	C6K	M	A	257012
Vest Stadil Fjord	56.12	8.08	2004-03-31	NB	C6M	M	J	264303
Vest Stadil Fjord	56.12	8.08	2004-03-31	NB	C6R	M	A	264306
Vest Stadil Fjord	56.12	8.08	2004-03-31	NB	C6S	M	A	264307
Vest Stadil Fjord	56.12	8.08	2004-03-31	NB	C6Z	M	A	264313
Vest Stadil Fjord	56.12	8.08	2004-03-31	NB	C7B	M	A	264315
Vest Stadil Fjord	56.12	8.08	2004-03-31	NB	C7G	M	A	264320
Vest Stadil Fjord	56.12	8.08	2004-03-31	NB	C7K	M	A	264323
Vest Stadil Fjord	56.12	8.08	2004-03-31	NB	C7M	M	A	264325
Vest Stadil Fjord	56.12	8.08	2004-03-31	NB	C7R	M	A	264328
Vest Stadil Fjord	56.12	8.08	2004-03-31	NB	C7T	M	J	264330
Vest Stadil Fjord	56.12	8.08	2004-03-31	NB	C7U	M	A	264331
Vest Stadil Fjord	56.12	8.08	2004-03-31	NB	C7X	M	A	264332
Vest Stadil Fjord	56.12	8.08	2004-03-31	NB	C7Y	M	A	264333
Vest Stadil Fjord	56.12	8.08	2004-03-31	NB	C8J	M	A	264341
Vest Stadil Fjord	56.12	8.08	2004-03-31	NB	C8K	M	A	264342
Vest Stadil Fjord	56.12	8.08	2004-03-31	NB	C8L	M	A	264343
Vest Stadil Fjord	56.12	8.08	2004-03-31	NB	C8M	M	A	264344
Vest Stadil Fjord	56.12	8.08	2004-03-31	NB	C8N	M	J	264345
Vest Stadil Fjord	56.12	8.08	2004-03-31	NB	C8T	M	A	264349
Vest Stadil Fjord	56.12	8.08	2004-03-31	NB	C8U	M	A	264350
Vest Stadil Fjord	56.12	8.08	2004-03-31	NB	C8X	M	A	264352
Vest Stadil Fjord	56.12	8.08	2004-03-31	NB	C8Z	M	A	264354
Vest Stadil Fjord	56.1283	8.13194	2005-03-30	NB	E2A	F	A	264356
Vest Stadil Fjord	56.1283	8.13194	2005-03-30	NB	E2K	F	A	264362
Vest Stadil Fjord	56.1283	8.13194	2005-03-30	NB	E2L	F	J	264363
Vest Stadil Fjord	56.1283	8.13194	2005-03-30	NB	E2M	F	A	264364
Vest Stadil Fjord	56.1283	8.13194	2005-03-30	NB	E2P	F	J	264366
Vest Stadil Fjord	56.1283	8.13194	2005-03-30	NB	E2S	F	J	264368
Vest Stadil Fjord	56.1283	8.13194	2005-03-30	NB	E3E	F	A	264375
Vest Stadil Fjord	56.1283	8.13194	2005-03-30	NB	E3H	F	A	264377
Vest Stadil Fjord	56.1283	8.13194	2005-03-30	NB	E3J	F	A	264378
Vest Stadil Fjord	56.1283	8.13194	2005-03-30	NB	E3K	F	A	264379
Vest Stadil Fjord	56.1283	8.13194	2005-03-30	NB	E3M	F	A	264381
Vest Stadil Fjord	56.1283	8.13194	2005-03-30	NB	E3U	F	A	264387
Vest Stadil Fjord	56.1283	8.13194	2005-03-30	NB	E3Y	F	A	252452
Vest Stadil Fjord	56.1283	8.13194	2005-03-30	NB	E4E	F	A	264392
Vest Stadil Fjord	56.1283	8.13194	2005-03-30	NB	E4G	F	A	264393
Vest Stadil Fjord	56.1283	8.13194	2005-03-30	NB	E4H	F	A	264394
Vest Stadil Fjord	56.1283	8.13194	2005-03-30	NB	E4L	F	A	264397
Vest Stadil Fjord	56.1283	8.13194	2005-03-30	NB	E4P	F	A	252205
Vest Stadil Fjord	56.1283	8.13194	2005-03-30	NB	E4T	F	A	264402
Vest Stadil Fjord	56.1283	8.13194	2005-03-30	NB	E4X	F	A	252445
Vest Stadil Fjord	56.1283	8.13194	2005-03-30	NB	E5B	F	A	264407
Vest Stadil Fjord	56.1283	8.13194	2005-03-30	NB	E5E	F	A	251626
Vest Stadil Fjord	56.1283	8.13194	2005-03-30	NB	E5K	F	J	264411
Vest Stadil Fjord	56.1283	8.13194	2005-03-30	NB	E5M	F	J	264413
Vest Stadil Fjord	56.1283	8.13194	2005-03-30	NB	E5Y	F	A	264420
Vest Stadil Fjord	56.1283	8.13194	2005-03-30	NB	E6E	F	J	264424
Vest Stadil Fjord	56.1283	8.13194	2005-03-30	NB	E6H	F	A	264426
Vest Stadil Fjord	56.1283	8.13194	2005-03-30	NB	E6R	F	J	264432
Vest Stadil Fjord	56.1283	8.13194	2005-03-30	NB	E7E	F	A	264441
Vest Stadil Fjord	56.1283	8.13194	2005-03-30	NB	E7G	F	A	264442
Vest Stadil Fjord	56.1283	8.13194	2005-03-30	NB	E7J	F	A	264444
Vest Stadil Fjord	56.1283	8.13194	2005-03-30	NB	E7L	F	A	298810
Vest Stadil Fjord	56.1283	8.13194	2005-03-30	NB	E7M	F	A	264446
Vest Stadil Fjord	56.1283	8.13194	2005-03-30	NB	E7P	F	A	264448
Vest Stadil Fjord	56.1283	8.13194	2005-03-30	NB	E7R	F	A	264449
Vest Stadil Fjord	56.1283	8.13194	2005-03-30	NB	E7X	F	A	264453
Vest Stadil Fjord	56.1283	8.13194	2005-03-30	NB	E7Z	F	A	264455
Vest Stadil Fjord	56.1283	8.13194	2005-03-30	NB	E8A	F	A	264456
Vest Stadil Fjord	56.1283	8.13194	2005-03-30	NB	E8B	F	A	264457
Vest Stadil Fjord	56.1283	8.13194	2005-03-30	NB	E8E	F	A	264458
Vest Stadil Fjord	56.1283	8.13194	2005-03-30	NB	E8H	F	A	251892
Vest Stadil Fjord	56.1283	8.13194	2005-03-30	NB	E8K	F	A	264461
Vest Stadil Fjord	56.1283	8.13194	2005-03-30	NB	E8N	F	A	264464
Vest Stadil Fjord	56.1283	8.13194	2005-03-30	NB	E8T	F	A	264468
Vest Stadil Fjord	56.1283	8.13194	2005-03-30	NB	H2A	F	A	251631
Vest Stadil Fjord	56.1283	8.13194	2005-03-30	NB	H2C	F	A	264473
Vest Stadil Fjord	56.1283	8.13194	2005-03-30	NB	H2E	F	A	264474
Vest Stadil Fjord	56.1283	8.13194	2005-03-30	NB	H2R	F	A	264483
Vest Stadil Fjord	56.1283	8.13194	2005-03-30	NB	H2S	F	J	264484
Vest Stadil Fjord	56.1283	8.13194	2005-03-30	NB	H2T	F	A	264485
Vest Stadil Fjord	56.1283	8.13194	2005-03-30	NB	H2Y	F	A	264488
Vest Stadil Fjord	56.1283	8.13194	2005-03-30	NB	H3J	F	J	264495
Vest Stadil Fjord	56.1283	8.13194	2005-03-30	NB	H3L	F	J	264497
Vest Stadil Fjord	56.1283	8.13194	2005-03-30	NB	H3S	F	A	252492
Vest Stadil Fjord	56.1283	8.13194	2005-03-30	NB	H3T	F	A	264502
Vest Stadil Fjord	56.1283	8.13194	2005-03-30	NB	H3U	F	J	257516
Vest Stadil Fjord	56.1283	8.13194	2005-03-30	NB	H4B	F	A	264507
Vest Stadil Fjord	56.1283	8.13194	2005-03-30	NB	H4K	F	A	264511
Vest Stadil Fjord	56.1283	8.13194	2005-03-30	NB	H4N	F	A	264514
Vest Stadil Fjord	56.1283	8.13194	2005-03-30	NB	H4S	F	A	264517
Vest Stadil Fjord	56.1283	8.13194	2005-03-30	NB	H5A	F	J	264521
Vest Stadil Fjord	56.1283	8.13194	2005-03-30	NB	H5B	F	A	264522
Vest Stadil Fjord	56.1283	8.13194	2005-03-30	NB	H5E	F	A	264524
Vest Stadil Fjord	56.1283	8.13194	2005-03-30	NB	H5H	F	A	251623
Vest Stadil Fjord	56.1283	8.13194	2005-03-30	NB	H5M	F	J	264529
Vest Stadil Fjord	56.1283	8.13194	2005-03-30	NB	H5N	F	A	264530
Vest Stadil Fjord	56.1283	8.13194	2005-03-30	NB	H5S	F	A	264533
Vest Stadil Fjord	56.1283	8.13194	2005-03-30	NB	H5T	F	A	264534
Vest Stadil Fjord	56.1283	8.13194	2005-03-30	NB	H5X	F	A	264536
Vest Stadil Fjord	56.1283	8.13194	2005-03-30	NB	H6C	F	A	264541
Vest Stadil Fjord	56.1283	8.13194	2005-03-30	NB	H6E	F	A	264542
Vest Stadil Fjord	56.1283	8.13194	2005-03-30	NB	H6L	F	A	264546
Vest Stadil Fjord	56.1283	8.13194	2005-03-30	NB	H6M	F	A	264547
Vest Stadil Fjord	56.1283	8.13194	2005-03-30	NB	H6P	F	J	264549
Vest Stadil Fjord	56.1283	8.13194	2005-03-30	NB	H6U	F	J	264552
Vest Stadil Fjord	56.1283	8.13194	2005-03-30	NB	H6X	F	A	252453
Vest Stadil Fjord	56.1283	8.13194	2005-03-30	NB	H6Z	F	A	251893
Vest Stadil Fjord	56.1283	8.13194	2005-03-30	NB	H7G	F	A	264556
Vest Stadil Fjord	56.1283	8.13194	2005-03-30	NB	H7H	F	A	264557
Vest Stadil Fjord	56.1283	8.13194	2005-03-30	NB	H7X	F	A	252483
Vest Stadil Fjord	56.1283	8.13194	2005-03-30	NB	H8R	F	A	264579
Vest Stadil Fjord	56.1283	8.13194	2005-03-30	NB	H8S	F	A	264580
Vest Stadil Fjord	56.1283	8.13194	2005-03-30	NB	H8Y	F	J	264584
Vest Stadil Fjord	56.1283	8.13194	2005-03-30	NB	I2C	F	A	264587
Vest Stadil Fjord	56.1283	8.13194	2005-03-30	NB	I2J	F	A	264590
Vest Stadil Fjord	56.1283	8.13194	2005-03-30	NB	I2P	F	A	264595
Vest Stadil Fjord	56.1283	8.13194	2005-03-30	NB	I2R	F	A	264596
Vest Stadil Fjord	56.1283	8.13194	2005-03-30	NB	I2S	F	A	264597
Vest Stadil Fjord	56.1283	8.13194	2005-03-30	NB	I2Y	F	A	264600
Vest Stadil Fjord	56.1283	8.13194	2005-03-30	NB	I2Z	F	A	256718
Vest Stadil Fjord	56.1283	8.13194	2005-03-30	NB	I3A	F	A	257510
Vest Stadil Fjord	56.1283	8.13194	2005-03-30	NB	I3B	F	J	264601
Vest Stadil Fjord	56.1283	8.13194	2005-03-30	NB	I3E	F	A	264603
Vest Stadil Fjord	56.1283	8.13194	2005-03-30	NB	I3H	F	A	264605
Vest Stadil Fjord	56.1283	8.13194	2005-03-30	NB	I3M	F	A	264609
Vest Stadil Fjord	56.1283	8.13194	2005-03-30	NB	I3P	F	J	264611
Vest Stadil Fjord	56.1283	8.13194	2005-03-30	NB	I3R	F	A	264612
Vest Stadil Fjord	56.1283	8.13194	2005-03-30	NB	I3T	F	A	264614
Vest Stadil Fjord	56.1283	8.13194	2005-03-30	NB	I3X	F	A	251629
Vest Stadil Fjord	56.1283	8.13194	2005-03-30	NB	I3Y	F	A	264616
Vest Stadil Fjord	56.1283	8.13194	2005-03-30	NB	I4B	F	A	264618
Vest Stadil Fjord	56.1283	8.13194	2005-03-30	NB	I4E	F	A	264620
Vest Stadil Fjord	56.1283	8.13194	2005-03-30	NB	I4H	F	A	264622
Vest Stadil Fjord	56.1283	8.13194	2005-03-30	NB	I4K	F	J	264624
Vest Stadil Fjord	56.1283	8.13194	2005-03-30	NB	I4L	F	A	264625
Vest Stadil Fjord	56.1283	8.13194	2005-03-30	NB	I4R	F	A	264628
Vest Stadil Fjord	56.1283	8.13194	2005-03-30	NB	I4S	F	A	264629
Vest Stadil Fjord	56.1283	8.13194	2005-03-30	NB	I5A	F	J	264634
Vest Stadil Fjord	56.1283	8.13194	2005-03-30	NB	I5B	F	A	264635
Vest Stadil Fjord	56.1283	8.13194	2005-03-30	NB	I5E	F	A	264637
Vest Stadil Fjord	56.1283	8.13194	2005-03-30	NB	I5H	F	A	264639
Vest Stadil Fjord	56.1283	8.13194	2005-03-30	NB	I5K	F	A	264641
Vest Stadil Fjord	56.1283	8.13194	2005-03-30	NB	I5S	F	J	264645
Vest Stadil Fjord	56.1283	8.13194	2005-03-30	NB	I5T	F	A	264646
Vest Stadil Fjord	56.1283	8.13194	2005-03-30	NB	I5Y	F	A	264648
Vest Stadil Fjord	56.1283	8.13194	2005-03-30	NB	I6A	F	J	264650
Vest Stadil Fjord	56.1283	8.13194	2005-03-30	NB	I6L	F	A	264656
Vest Stadil Fjord	56.1283	8.13194	2005-03-30	NB	I6M	F	A	264657
Vest Stadil Fjord	56.1283	8.13194	2005-03-30	NB	I6S	F	J	264661
Vest Stadil Fjord	56.1283	8.13194	2005-03-30	NB	I6U	F	J	264663
Vest Stadil Fjord	56.1283	8.13194	2005-03-30	NB	I7B	F	A	264667
Vest Stadil Fjord	56.1283	8.13194	2005-03-30	NB	I7C	F	A	264668
Vest Stadil Fjord	56.1283	8.13194	2005-03-30	NB	I7K	F	A	264673
Vest Stadil Fjord	56.1283	8.13194	2005-03-30	NB	I8A	F	A	264685
Vest Stadil Fjord	56.1283	8.13194	2005-03-30	NB	I8B	F	A	264686
Vest Stadil Fjord	56.1283	8.13194	2005-03-30	NB	I8J	F	A	264691
Vest Stadil Fjord	56.1283	8.13194	2005-03-30	NB	I8X	F	A	264700
Vest Stadil Fjord	56.1283	8.13194	2005-03-30	NB	E2G	M	J	264360
Vest Stadil Fjord	56.1283	8.13194	2005-03-30	NB	E2T	M	J	264369
Vest Stadil Fjord	56.1283	8.13194	2005-03-30	NB	E2U	M	J	252186
Vest Stadil Fjord	56.1283	8.13194	2005-03-30	NB	E2Y	M	A	264371
Vest Stadil Fjord	56.1283	8.13194	2005-03-30	NB	E2Z	M	J	264372
Vest Stadil Fjord	56.1283	8.13194	2005-03-30	NB	E3B	M	J	264373
Vest Stadil Fjord	56.1283	8.13194	2005-03-30	NB	E3G	M	A	264376
Vest Stadil Fjord	56.1283	8.13194	2005-03-30	NB	E3L	M	A	264380
Vest Stadil Fjord	56.1283	8.13194	2005-03-30	NB	E3R	M	A	264384
Vest Stadil Fjord	56.1283	8.13194	2005-03-30	NB	E3S	M	A	264385
Vest Stadil Fjord	56.1283	8.13194	2005-03-30	NB	E3Z	M	A	264389
Vest Stadil Fjord	56.1283	8.13194	2005-03-30	NB	E4B	M	J	264390
Vest Stadil Fjord	56.1283	8.13194	2005-03-30	NB	E4C	M	A	264391
Vest Stadil Fjord	56.1283	8.13194	2005-03-30	NB	E4K	M	A	264396
Vest Stadil Fjord	56.1283	8.13194	2005-03-30	NB	E4M	M	A	264398
Vest Stadil Fjord	56.1283	8.13194	2005-03-30	NB	E4N	M	J	264399
Vest Stadil Fjord	56.1283	8.13194	2005-03-30	NB	E4R	M	A	264400
Vest Stadil Fjord	56.1283	8.13194	2005-03-30	NB	E4S	M	A	264401
Vest Stadil Fjord	56.1283	8.13194	2005-03-30	NB	E4U	M	A	264403
Vest Stadil Fjord	56.1283	8.13194	2005-03-30	NB	E4Y	M	A	264404
Vest Stadil Fjord	56.1283	8.13194	2005-03-30	NB	E4Z	M	A	264405
Vest Stadil Fjord	56.1283	8.13194	2005-03-30	NB	E5G	M	A	251707
Vest Stadil Fjord	56.1283	8.13194	2005-03-30	NB	E5H	M	A	264409
Vest Stadil Fjord	56.1283	8.13194	2005-03-30	NB	E5L	M	A	264412
Vest Stadil Fjord	56.1283	8.13194	2005-03-30	NB	E5N	M	J	264414
Vest Stadil Fjord	56.1283	8.13194	2005-03-30	NB	E5P	M	A	264415
Vest Stadil Fjord	56.1283	8.13194	2005-03-30	NB	E5R	M	A	252444
Vest Stadil Fjord	56.1283	8.13194	2005-03-30	NB	E5S	M	A	264416
Vest Stadil Fjord	56.1283	8.13194	2005-03-30	NB	E5T	M	A	264417
Vest Stadil Fjord	56.1283	8.13194	2005-03-30	NB	E5U	M	A	264418
Vest Stadil Fjord	56.1283	8.13194	2005-03-30	NB	E5Z	M	A	264421
Vest Stadil Fjord	56.1283	8.13194	2005-03-30	NB	E6A	M	A	252388
Vest Stadil Fjord	56.1283	8.13194	2005-03-30	NB	E6B	M	A	264422
Vest Stadil Fjord	56.1283	8.13194	2005-03-30	NB	E6C	M	A	264423
Vest Stadil Fjord	56.1283	8.13194	2005-03-30	NB	E6J	M	A	264427
Vest Stadil Fjord	56.1283	8.13194	2005-03-30	NB	E6K	M	A	264428
Vest Stadil Fjord	56.1283	8.13194	2005-03-30	NB	E6L	M	J	252175
Vest Stadil Fjord	56.1283	8.13194	2005-03-30	NB	E6N	M	A	264430
Vest Stadil Fjord	56.1283	8.13194	2005-03-30	NB	E6P	M	A	264431
Vest Stadil Fjord	56.1283	8.13194	2005-03-30	NB	E6T	M	A	264434
Vest Stadil Fjord	56.1283	8.13194	2005-03-30	NB	E6U	M	A	264435
Vest Stadil Fjord	56.1283	8.13194	2005-03-30	NB	E6Y	M	J	264437
Vest Stadil Fjord	56.1283	8.13194	2005-03-30	NB	E6Z	M	A	264438
Vest Stadil Fjord	56.1283	8.13194	2005-03-30	NB	E7A	M	A	264439
Vest Stadil Fjord	56.1283	8.13194	2005-03-30	NB	E7B	M	A	252436
Vest Stadil Fjord	56.1283	8.13194	2005-03-30	NB	E7C	M	A	264440
Vest Stadil Fjord	56.1283	8.13194	2005-03-30	NB	E7T	M	J	264451
Vest Stadil Fjord	56.1283	8.13194	2005-03-30	NB	E7U	M	A	264452
Vest Stadil Fjord	56.1283	8.13194	2005-03-30	NB	E7Y	M	A	264454
Vest Stadil Fjord	56.1283	8.13194	2005-03-30	NB	E8C	M	J	252566
Vest Stadil Fjord	56.1283	8.13194	2005-03-30	NB	E8G	M	A	264459
Vest Stadil Fjord	56.1283	8.13194	2005-03-30	NB	E8M	M	J	264463
Vest Stadil Fjord	56.1283	8.13194	2005-03-30	NB	E8R	M	A	264466
Vest Stadil Fjord	56.1283	8.13194	2005-03-30	NB	E8S	M	A	264467
Vest Stadil Fjord	56.1283	8.13194	2005-03-30	NB	E8U	M	A	257122
Vest Stadil Fjord	56.1283	8.13194	2005-03-30	NB	E8X	M	A	264469
Vest Stadil Fjord	56.1283	8.13194	2005-03-30	NB	E8Y	M	A	264470
Vest Stadil Fjord	56.1283	8.13194	2005-03-30	NB	E8Z	M	A	264471
Vest Stadil Fjord	56.1283	8.13194	2005-03-30	NB	H2B	M	A	264472
Vest Stadil Fjord	56.1283	8.13194	2005-03-30	NB	H2G	M	A	264475
Vest Stadil Fjord	56.1283	8.13194	2005-03-30	NB	H2H	M	A	264476
Vest Stadil Fjord	56.1283	8.13194	2005-03-30	NB	H2K	M	A	264478
Vest Stadil Fjord	56.1283	8.13194	2005-03-30	NB	H2L	M	J	264479
Vest Stadil Fjord	56.1283	8.13194	2005-03-30	NB	H2P	M	J	264482
Vest Stadil Fjord	56.1283	8.13194	2005-03-30	NB	H2X	M	A	264487
Vest Stadil Fjord	56.1283	8.13194	2005-03-30	NB	H3A	M	J	264490
Vest Stadil Fjord	56.1283	8.13194	2005-03-30	NB	H3B	M	J	251637
Vest Stadil Fjord	56.1283	8.13194	2005-03-30	NB	H3C	M	A	264491
Vest Stadil Fjord	56.1283	8.13194	2005-03-30	NB	H3E	M	A	264492
Vest Stadil Fjord	56.1283	8.13194	2005-03-30	NB	H3H	M	A	264494
Vest Stadil Fjord	56.1283	8.13194	2005-03-30	NB	H3M	M	A	264498
Vest Stadil Fjord	56.1283	8.13194	2005-03-30	NB	H3N	M	J	264499
Vest Stadil Fjord	56.1283	8.13194	2005-03-30	NB	H3P	M	A	264500
Vest Stadil Fjord	56.1283	8.13194	2005-03-30	NB	H3X	M	A	264503
Vest Stadil Fjord	56.1283	8.13194	2005-03-30	NB	H3Y	M	J	264504
Vest Stadil Fjord	56.1283	8.13194	2005-03-30	NB	H3Z	M	A	264505
Vest Stadil Fjord	56.1283	8.13194	2005-03-30	NB	H4A	M	A	264506
Vest Stadil Fjord	56.1283	8.13194	2005-03-30	NB	H4C	M	A	264508
Vest Stadil Fjord	56.1283	8.13194	2005-03-30	NB	H4E	M	A	252429
Vest Stadil Fjord	56.1283	8.13194	2005-03-30	NB	H4H	M	A	264510
Vest Stadil Fjord	56.1283	8.13194	2005-03-30	NB	H4J	M	A	252886
Vest Stadil Fjord	56.1283	8.13194	2005-03-30	NB	H4R	M	A	264516
Vest Stadil Fjord	56.1283	8.13194	2005-03-30	NB	H4U	M	A	257016
Vest Stadil Fjord	56.1283	8.13194	2005-03-30	NB	H4X	M	A	252204
Vest Stadil Fjord	56.1283	8.13194	2005-03-30	NB	H4Y	M	A	264519
Vest Stadil Fjord	56.1283	8.13194	2005-03-30	NB	H4Z	M	A	264520
Vest Stadil Fjord	56.1283	8.13194	2005-03-30	NB	H5C	M	A	264523
Vest Stadil Fjord	56.1283	8.13194	2005-03-30	NB	H5K	M	A	264527
Vest Stadil Fjord	56.1283	8.13194	2005-03-30	NB	H5L	M	J	264528
Vest Stadil Fjord	56.1283	8.13194	2005-03-30	NB	H5P	M	A	264531
Vest Stadil Fjord	56.1283	8.13194	2005-03-30	NB	H5R	M	A	264532
Vest Stadil Fjord	56.1283	8.13194	2005-03-30	NB	H5U	M	A	264535
Vest Stadil Fjord	56.1283	8.13194	2005-03-30	NB	H5Y	M	A	264537
Vest Stadil Fjord	56.1283	8.13194	2005-03-30	NB	H6A	M	A	264539
Vest Stadil Fjord	56.1283	8.13194	2005-03-30	NB	H6B	M	A	264540
Vest Stadil Fjord	56.1283	8.13194	2005-03-30	NB	H6G	M	J	264543
Vest Stadil Fjord	56.1283	8.13194	2005-03-30	NB	H6J	M	J	264545
Vest Stadil Fjord	56.1283	8.13194	2005-03-30	NB	H6K	M	A	252192
Vest Stadil Fjord	56.1283	8.13194	2005-03-30	NB	H6N	M	A	264548
Vest Stadil Fjord	56.1283	8.13194	2005-03-30	NB	H6R	M	A	264550
Vest Stadil Fjord	56.1283	8.13194	2005-03-30	NB	H6S	M	A	264551
Vest Stadil Fjord	56.1283	8.13194	2005-03-30	NB	H7A	M	A	252431
Vest Stadil Fjord	56.1283	8.13194	2005-03-30	NB	H7B	M	A	252512
Vest Stadil Fjord	56.1283	8.13194	2005-03-30	NB	H7C	M	A	264554
Vest Stadil Fjord	56.1283	8.13194	2005-03-30	NB	H7J	M	A	264558
Vest Stadil Fjord	56.1283	8.13194	2005-03-30	NB	H7K	M	A	264559
Vest Stadil Fjord	56.1283	8.13194	2005-03-30	NB	H7L	M	A	264560
Vest Stadil Fjord	56.1283	8.13194	2005-03-30	NB	H7M	M	A	264561
Vest Stadil Fjord	56.1283	8.13194	2005-03-30	NB	H7P	M	A	264563
Vest Stadil Fjord	56.1283	8.13194	2005-03-30	NB	H7R	M	A	252434
Vest Stadil Fjord	56.1283	8.13194	2005-03-30	NB	H7S	M	A	264564
Vest Stadil Fjord	56.1283	8.13194	2005-03-30	NB	H7T	M	A	264565
Vest Stadil Fjord	56.1283	8.13194	2005-03-30	NB	H7U	M	A	264566
Vest Stadil Fjord	56.1283	8.13194	2005-03-30	NB	H7Z	M	A	264568
Vest Stadil Fjord	56.1283	8.13194	2005-03-30	NB	H8A	M	A	252454
Vest Stadil Fjord	56.1283	8.13194	2005-03-30	NB	H8B	M	A	264569
Vest Stadil Fjord	56.1283	8.13194	2005-03-30	NB	H8E	M	A	251708
Vest Stadil Fjord	56.1283	8.13194	2005-03-30	NB	H8G	M	A	264571
Vest Stadil Fjord	56.1283	8.13194	2005-03-30	NB	H8H	M	A	264572
Vest Stadil Fjord	56.1283	8.13194	2005-03-30	NB	H8L	M	A	264575
Vest Stadil Fjord	56.1283	8.13194	2005-03-30	NB	H8M	M	J	264576
Vest Stadil Fjord	56.1283	8.13194	2005-03-30	NB	H8N	M	A	264577
Vest Stadil Fjord	56.1283	8.13194	2005-03-30	NB	H8P	M	A	264578
Vest Stadil Fjord	56.1283	8.13194	2005-03-30	NB	H8T	M	A	264581
Vest Stadil Fjord	56.1283	8.13194	2005-03-30	NB	H8U	M	A	264582
Vest Stadil Fjord	56.1283	8.13194	2005-03-30	NB	H8Z	M	A	251620
Vest Stadil Fjord	56.1283	8.13194	2005-03-30	NB	I2A	M	A	264585
Vest Stadil Fjord	56.1283	8.13194	2005-03-30	NB	I2E	M	A	264588
Vest Stadil Fjord	56.1283	8.13194	2005-03-30	NB	I2H	M	A	256717
Vest Stadil Fjord	56.1283	8.13194	2005-03-30	NB	I2K	M	J	264591
Vest Stadil Fjord	56.1283	8.13194	2005-03-30	NB	I2L	M	A	264592
Vest Stadil Fjord	56.1283	8.13194	2005-03-30	NB	I2M	M	J	264593
Vest Stadil Fjord	56.1283	8.13194	2005-03-30	NB	I2N	M	A	264594
Vest Stadil Fjord	56.1283	8.13194	2005-03-30	NB	I2U	M	A	252768
Vest Stadil Fjord	56.1283	8.13194	2005-03-30	NB	I2X	M	A	264599
Vest Stadil Fjord	56.1283	8.13194	2005-03-30	NB	I3C	M	A	264602
Vest Stadil Fjord	56.1283	8.13194	2005-03-30	NB	I3G	M	A	264604
Vest Stadil Fjord	56.1283	8.13194	2005-03-30	NB	I3K	M	A	264607
Vest Stadil Fjord	56.1283	8.13194	2005-03-30	NB	I3L	M	J	264608
Vest Stadil Fjord	56.1283	8.13194	2005-03-30	NB	I3S	M	A	264613
Vest Stadil Fjord	56.1283	8.13194	2005-03-30	NB	I4A	M	A	252893
Vest Stadil Fjord	56.1283	8.13194	2005-03-30	NB	I4C	M	A	264619
Vest Stadil Fjord	56.1283	8.13194	2005-03-30	NB	I4G	M	A	264621
Vest Stadil Fjord	56.1283	8.13194	2005-03-30	NB	I4J	M	A	264623
Vest Stadil Fjord	56.1283	8.13194	2005-03-30	NB	I4M	M	A	264626
Vest Stadil Fjord	56.1283	8.13194	2005-03-30	NB	I4N	M	J	251621
Vest Stadil Fjord	56.1283	8.13194	2005-03-30	NB	I4U	M	A	264631
Vest Stadil Fjord	56.1283	8.13194	2005-03-30	NB	I4X	M	A	258466
Vest Stadil Fjord	56.1283	8.13194	2005-03-30	NB	I4Z	M	A	264633
Vest Stadil Fjord	56.1283	8.13194	2005-03-30	NB	I5C	M	J	264636
Vest Stadil Fjord	56.1283	8.13194	2005-03-30	NB	I5G	M	A	264638
Vest Stadil Fjord	56.1283	8.13194	2005-03-30	NB	I5J	M	A	264640
Vest Stadil Fjord	56.1283	8.13194	2005-03-30	NB	I5L	M	A	251624
Vest Stadil Fjord	56.1283	8.13194	2005-03-30	NB	I5M	M	A	252437
Vest Stadil Fjord	56.1283	8.13194	2005-03-30	NB	I5R	M	A	264644
Vest Stadil Fjord	56.1283	8.13194	2005-03-30	NB	I5X	M	A	252441
Vest Stadil Fjord	56.1283	8.13194	2005-03-30	NB	I5Z	M	A	264649
Vest Stadil Fjord	56.1283	8.13194	2005-03-30	NB	I6B	M	J	264651
Vest Stadil Fjord	56.1283	8.13194	2005-03-30	NB	I6C	M	A	264652
Vest Stadil Fjord	56.1283	8.13194	2005-03-30	NB	I6E	M	A	264653
Vest Stadil Fjord	56.1283	8.13194	2005-03-30	NB	I6G	M	A	264654
Vest Stadil Fjord	56.1283	8.13194	2005-03-30	NB	I6H	M	A	264655
Vest Stadil Fjord	56.1283	8.13194	2005-03-30	NB	I6J	M	J	251709
Vest Stadil Fjord	56.1283	8.13194	2005-03-30	NB	I6K	M	A	257513
Vest Stadil Fjord	56.1283	8.13194	2005-03-30	NB	I6N	M	A	264658
Vest Stadil Fjord	56.1283	8.13194	2005-03-30	NB	I6P	M	A	264659
Vest Stadil Fjord	56.1283	8.13194	2005-03-30	NB	I6R	M	J	264660
Vest Stadil Fjord	56.1283	8.13194	2005-03-30	NB	I6T	M	A	264662
Vest Stadil Fjord	56.1283	8.13194	2005-03-30	NB	I6X	M	A	251710
Vest Stadil Fjord	56.1283	8.13194	2005-03-30	NB	I6Z	M	A	264665
Vest Stadil Fjord	56.1283	8.13194	2005-03-30	NB	I7A	M	A	264666
Vest Stadil Fjord	56.1283	8.13194	2005-03-30	NB	I7G	M	A	264670
Vest Stadil Fjord	56.1283	8.13194	2005-03-30	NB	I7J	M	A	264672
Vest Stadil Fjord	56.1283	8.13194	2005-03-30	NB	I7M	M	A	264675
Vest Stadil Fjord	56.1283	8.13194	2005-03-30	NB	I7N	M	A	264676
Vest Stadil Fjord	56.1283	8.13194	2005-03-30	NB	I7P	M	A	264677
Vest Stadil Fjord	56.1283	8.13194	2005-03-30	NB	I7R	M	A	264678
Vest Stadil Fjord	56.1283	8.13194	2005-03-30	NB	I7T	M	A	264680
Vest Stadil Fjord	56.1283	8.13194	2005-03-30	NB	I7U	M	A	264681
Vest Stadil Fjord	56.1283	8.13194	2005-03-30	NB	I7X	M	J	264682
Vest Stadil Fjord	56.1283	8.13194	2005-03-30	NB	I7Y	M	A	264683
Vest Stadil Fjord	56.1283	8.13194	2005-03-30	NB	I8E	M	A	264688
Vest Stadil Fjord	56.1283	8.13194	2005-03-30	NB	I8G	M	A	264689
Vest Stadil Fjord	56.1283	8.13194	2005-03-30	NB	I8H	M	A	264690
Vest Stadil Fjord	56.1283	8.13194	2005-03-30	NB	I8K	M	A	264692
Vest Stadil Fjord	56.1283	8.13194	2005-03-30	NB	I8P	M	A	264696
Vest Stadil Fjord	56.1283	8.13194	2005-03-30	NB	I8R	M	A	252432
Vest Stadil Fjord	56.1283	8.13194	2005-03-30	NB	I8S	M	A	264697
Vest Stadil Fjord	56.1283	8.13194	2005-03-30	NB	I8T	M	A	264698
Vest Stadil Fjord	56.1283	8.13194	2005-03-30	NB	I8U	M	A	264699
Vest Stadil Fjord	56.1283	8.13194	2005-03-30	NB	I8Y	M	A	252486
Vest Stadil Fjord	56.12	8.08	2007-03-27	NW	A02	F	J	264702
Vest Stadil Fjord	56.12	8.08	2007-03-27	NW	A12	F	J	264708
Vest Stadil Fjord	56.12	8.08	2007-03-27	NW	A13	F	J	264709
Vest Stadil Fjord	56.12	8.08	2007-03-27	NW	A20	F	J	264713
Vest Stadil Fjord	56.12	8.08	2007-03-27	NW	A23	F	A	252195
Vest Stadil Fjord	56.12	8.08	2007-03-27	NW	A31	F	A	251837
Vest Stadil Fjord	56.12	8.08	2007-03-27	NW	A34	F	J	264723
Vest Stadil Fjord	56.12	8.08	2007-03-27	NW	A39	F	A	252193
Vest Stadil Fjord	56.12	8.08	2007-03-27	NW	A40	F	A	264725
Vest Stadil Fjord	56.12	8.08	2007-03-27	NW	A44	F	A	264728
Vest Stadil Fjord	56.12	8.08	2007-03-27	NW	A48	F	A	264732
Vest Stadil Fjord	56.12	8.08	2007-03-27	NW	A52	F	A	264735
Vest Stadil Fjord	56.12	8.08	2007-03-27	NW	A54	F	A	251898
Vest Stadil Fjord	56.12	8.08	2007-03-27	NW	A67	F	A	264745
Vest Stadil Fjord	56.12	8.08	2007-03-27	NW	A70	F	J	264746
Vest Stadil Fjord	56.12	8.08	2007-03-27	NW	A72	F	A	264748
Vest Stadil Fjord	56.12	8.08	2007-03-27	NW	A73	F	A	252840
Vest Stadil Fjord	56.12	8.08	2007-03-27	NW	A77	F	A	264751
Vest Stadil Fjord	56.12	8.08	2007-03-27	NW	A93	F	A	264761
Vest Stadil Fjord	56.12	8.08	2007-03-27	NW	A94	F	A	264762
Vest Stadil Fjord	56.12	8.08	2007-03-27	NW	B07	F	A	264767
Vest Stadil Fjord	56.12	8.08	2007-03-27	NW	B13	F	A	257208
Vest Stadil Fjord	56.12	8.08	2007-03-27	NW	B14	F	A	264770
Vest Stadil Fjord	56.12	8.08	2007-03-27	NW	B27	F	A	264779
Vest Stadil Fjord	56.12	8.08	2007-03-27	NW	B28	F	J	264780
Vest Stadil Fjord	56.12	8.08	2007-03-27	NW	B29	F	A	264781
Vest Stadil Fjord	56.12	8.08	2007-03-27	NW	B40	F	J	264791
Vest Stadil Fjord	56.12	8.08	2007-03-27	NW	B44	F	A	252173
Vest Stadil Fjord	56.12	8.08	2007-03-27	NW	B50	F	J	252188
Vest Stadil Fjord	56.12	8.08	2007-03-27	NW	B51	F	A	264799
Vest Stadil Fjord	56.12	8.08	2007-03-27	NW	B65	F	A	252183
Vest Stadil Fjord	56.12	8.08	2007-03-27	NW	B74	F	A	264812
Vest Stadil Fjord	56.12	8.08	2007-03-27	NW	B77	F	A	264815
Vest Stadil Fjord	56.12	8.08	2007-03-27	NW	B79	F	J	264817
Vest Stadil Fjord	56.12	8.08	2007-03-27	NW	B83	F	A	264819
Vest Stadil Fjord	56.12	8.08	2007-03-27	NW	B93	F	J	264824
Vest Stadil Fjord	56.12	8.08	2007-03-27	NW	C03	F	A	252246
Vest Stadil Fjord	56.12	8.08	2007-03-27	NW	C15	F	A	251800
Vest Stadil Fjord	56.12	8.08	2007-03-27	NW	C21	F	A	264837
Vest Stadil Fjord	56.12	8.08	2007-03-27	NW	C24	F	A	264840
Vest Stadil Fjord	56.12	8.08	2007-03-27	NW	C25	F	A	252569
Vest Stadil Fjord	56.12	8.08	2007-03-27	NW	C33	F	A	264848
Vest Stadil Fjord	56.12	8.08	2007-03-27	NW	C39	F	A	264853
Vest Stadil Fjord	56.12	8.08	2007-03-27	NW	C40	F	J	264854
Vest Stadil Fjord	56.12	8.08	2007-03-27	NW	C41	F	A	252465
Vest Stadil Fjord	56.12	8.08	2007-03-27	NW	C44	F	A	252203
Vest Stadil Fjord	56.12	8.08	2007-03-27	NW	C47	F	A	264859
Vest Stadil Fjord	56.12	8.08	2007-03-27	NW	C48	F	A	264860
Vest Stadil Fjord	56.12	8.08	2007-03-27	NW	C50	F	A	264862
Vest Stadil Fjord	56.12	8.08	2007-03-27	NW	C51	F	A	264863
Vest Stadil Fjord	56.12	8.08	2007-03-27	NW	C53	F	A	264864
Vest Stadil Fjord	56.12	8.08	2007-03-27	NW	C56	F	A	264867
Vest Stadil Fjord	56.12	8.08	2007-03-27	NW	C64	F	A	264871
Vest Stadil Fjord	56.12	8.08	2007-03-27	NW	C67	F	J	264873
Vest Stadil Fjord	56.12	8.08	2007-03-27	NW	C71	F	A	258509
Vest Stadil Fjord	56.12	8.08	2007-03-27	NW	C75	F	A	264878
Vest Stadil Fjord	56.12	8.08	2007-03-27	NW	C77	F	A	252466
Vest Stadil Fjord	56.12	8.08	2007-03-27	NW	C84	F	A	264884
Vest Stadil Fjord	56.12	8.08	2007-03-27	NW	C92	F	A	252368
Vest Stadil Fjord	56.12	8.08	2007-03-27	NW	F03	F	A	264889
Vest Stadil Fjord	56.12	8.08	2007-03-27	NW	F04	F	A	252070
Vest Stadil Fjord	56.12	8.08	2007-03-27	NW	F07	F	A	264891
Vest Stadil Fjord	56.12	8.08	2007-03-27	NW	F17	F	A	264896
Vest Stadil Fjord	56.12	8.08	2007-03-27	NW	F23	F	A	264900
Vest Stadil Fjord	56.12	8.08	2007-03-27	NW	F26	F	J	264903
Vest Stadil Fjord	56.12	8.08	2007-03-27	NW	F27	F	A	252024
Vest Stadil Fjord	56.12	8.08	2007-03-27	NW	F29	F	A	264905
Vest Stadil Fjord	56.12	8.08	2007-03-27	NW	F30	F	J	264906
Vest Stadil Fjord	56.12	8.08	2007-03-27	NW	F35	F	J	264910
Vest Stadil Fjord	56.12	8.08	2007-03-27	NW	F39	F	A	264913
Vest Stadil Fjord	56.12	8.08	2007-03-27	NW	F40	F	J	252199
Vest Stadil Fjord	56.12	8.08	2007-03-27	NW	F45	F	A	264917
Vest Stadil Fjord	56.12	8.08	2007-03-27	NW	F54	F	A	264925
Vest Stadil Fjord	56.12	8.08	2007-03-27	NW	F64	F	A	251801
Vest Stadil Fjord	56.12	8.08	2007-03-27	NW	F73	F	J	264935
Vest Stadil Fjord	56.12	8.08	2007-03-27	NW	F74	F	A	264936
Vest Stadil Fjord	56.12	8.08	2007-03-27	NW	F77	F	A	252482
Vest Stadil Fjord	56.12	8.08	2007-03-27	NW	G17	F	A	264958
Vest Stadil Fjord	56.12	8.08	2007-03-27	NW	G25	F	A	264963
Vest Stadil Fjord	56.12	8.08	2007-03-27	NW	G30	F	A	264968
Vest Stadil Fjord	56.12	8.08	2007-03-27	NW	G34	F	J	264971
Vest Stadil Fjord	56.12	8.08	2007-03-27	NW	G37	F	A	264974
Vest Stadil Fjord	56.12	8.08	2007-03-27	NW	G42	F	A	252196
Vest Stadil Fjord	56.12	8.08	2007-03-27	NW	G44	F	A	252045
Vest Stadil Fjord	56.12	8.08	2007-03-27	NW	G45	F	A	264979
Vest Stadil Fjord	56.12	8.08	2007-03-27	NW	G48	F	A	264981
Vest Stadil Fjord	56.12	8.08	2007-03-27	NW	A14	M	J	264710
Vest Stadil Fjord	56.12	8.08	2007-03-27	NW	A25	M	A	264717
Vest Stadil Fjord	56.12	8.08	2007-03-27	NW	A28	M	J	264720
[truncated: 657 more rows]
